# Supplementary material for: Positive Evolutionary Selection of an HD Motif on Alzheimer Precursor Protein Orthologues Suggests a Functional Role
Source: PLoS Comput Biol. 2012 Feb 2;8(2):e1002356. doi: 10.1371/journal.pcbi.1002356 (PMC3271017; doi:10.1371/journal.pcbi.1002356)
Supplement: Figure S1 — Secondary structure predictions of some selected CAEDC70. (PDF) [file pcbi.1002356.s001.pdf]

A, *Nematostella*

JPRED

|                                 |                                                                 |            |
|---------------------------------|-----------------------------------------------------------------|------------|
| QUERY                           | : APTTPSAVHGEEDKNKPHRKHEERERHHGRHGNSKKHRKHDEEDEPENEDFFGEPRSPAT  | : QUERY    |
| <a href="#">UniRef90_A7RTM2</a> | : APTTPSAVHGEEDKNKPHRKHEERERHHGRHGNSKKHRKHDEEDEPENEDFFGEPRSPAT  | :          |
|                                 | : 1-----11-----21-----31-----41-----51-----                     | :          |
| OrigSeq                         | : APTTPSAVHGEEDKNKPHRKHEERERHHGRHGNSKKHRKHDEEDEPENEDFFGEPRSPAT  | : OrigSeq  |
| Jnet                            | : -----HHHHHH-----                                              | : Jnet     |
| jhmm                            | : -----                                                         | : jhmm     |
| jpssm                           | : -----HHHHHHHHHH-----                                          | : jpssm    |
| Lupas 14                        | : -----                                                         | : Lupas 14 |
| Lupas 21                        | : -----                                                         | : Lupas 21 |
| Lupas 28                        | : -----                                                         | : Lupas 28 |
| Jnet_25                         | : -----B-B-----BB-----                                          | : Jnet_25  |
| Jnet_5                          | : -----                                                         | : Jnet_5   |
| Jnet_0                          | : -----                                                         | : Jnet_0   |
| Jnet Rel                        | : 9988877777777777650000000000577777655356777776454221146777888 | : Jnet Rel |

PSIPRED

|                     |                                                                                                                           |
|---------------------|---------------------------------------------------------------------------------------------------------------------------|
| AA: Target sequence |                                                                                                                           |
| Conf                | : 9988885137645799651258887520688996201467888887632234589999999                                                           |
| Pred                | : CCCCCCCCCCCCCCCCCCCCCC H H H H H H H H C C C C C C C C C C C C C C C C C C C C C C C C                                  |
| AA                  | : A P T T P S A V H G E E D K N K P H R K H E E R E R H H G R H G N S K K H R K H D E E D E P E N E R D F F G E P R S P A |

B, *Caenorhabditis e.*

JPRED

|                                 |                                                            |            |
|---------------------------------|------------------------------------------------------------|------------|
| QUERY                           | : SSSSTSSEDEDEDKNIKELRVDIEPIIDEPASFYRHDKLIQSPEVERSASSVFQP  | : QUERY    |
| <a href="#">UniRef90_Q10651</a> | : -----KNIKELRVDIEPIIDEPASFYRHDKLIQSPEVERSASSVFQP          | :          |
|                                 | : 1-----11-----21-----31-----41-----51-----                | :          |
| OrigSeq                         | : SSSSTSSEDEDEDKNIKELRVDIEPIIDEPASFYRHDKLIQSPEVERSASSVFQP  | : OrigSeq  |
| Jnet                            | : -----HEEEE-----                                          | : Jnet     |
| jhmm                            | : -----HHEEEEE-----H-----                                  | : jhmm     |
| jpssm                           | : -----HHHHH-----HHH-----                                  | : jpssm    |
| Lupas 14                        | : -----                                                    | : Lupas 14 |
| Lupas 21                        | : -----                                                    | : Lupas 21 |
| Lupas 28                        | : -----                                                    | : Lupas 28 |
| Jnet_25                         | : -----B--B-B-B--BB--B-BB-B--BB--B--B--BB--                | : Jnet_25  |
| Jnet_5                          | : -----B-----                                              | : Jnet_5   |
| Jnet_0                          | : -----                                                    | : Jnet_0   |
| Jnet Rel                        | : 99888777765565400000002330001466523345056677665667763478 | : Jnet Rel |

PSIPRED

|      |                                                                                                                   |
|------|-------------------------------------------------------------------------------------------------------------------|
| Conf | : 9888888888885566304100000003203358853100022456924441245554479                                                   |
| Pred | : C C C C C C C C C C H H H H H C C C C H H C C C C C C C C C C H H C C C C C C H H H H H C C C C C C C C         |
| AA   | : S S S S T S S E S D E D E D K N I K E L R V D I E P I I D E P A S F Y R H D K L I Q S P E V E R S A S S V F Q P |

C, *Apis*

JPRED

|                                        |                                                                      |            |
|----------------------------------------|----------------------------------------------------------------------|------------|
| QUERY                                  | : LRTEQAQQEESDSINDNKDIQQQPEQPAAMHSEGLVRAAHS�THDISHSEPGYSVRREMYHRESRS | : QUERY    |
| <a href="#">UniRef90_UPI00015B49D1</a> | : -----HSEGLIRAHSMTHDVSHSEPSYSVRREYHRESR-----                        | :          |
|                                        | : 1-----11-----21-----31-----41-----51-----61-----                   | :          |
| OrigSeq                                | : LRTEQAQQEESDSINDNKDIQQQPEQPAAMHSEGLVRAAHS�THDISHSEPGYSVRREMYHRESRS | : OrigSeq  |
| Jnet                                   | : -----HHHHH-----HHHHHHHH-----HHHHHHHH-----                          | : Jnet     |
| jhmm                                   | : -----HHHHH-----HHHHHHH-----EEEEHHHH-----                           | : jhmm     |
| jpssm                                  | : -----HHHHHH-----HHHHHHHHHH-----HHHHHHHH-----                       | : jpssm    |
| Lupas 14                               | : -----                                                              | : Lupas 14 |
| Lupas 21                               | : -----                                                              | : Lupas 21 |
| Lupas 28                               | : -----                                                              | : Lupas 28 |
| Jnet_25                                | : -----B-----B-----BB-B-B-BBB-BB--B--B-----B-B--BB-----              | : Jnet_25  |
| Jnet_5                                 | : -----BB-B--B--B-----                                               | : Jnet_5   |
| Jnet_0                                 | : -----B-----                                                        | : Jnet_0   |
| Jnet Rel                               | : 997367764046777776543234356654564166665300036788776630000867621799 | : Jnet Rel |

PSIPRED

Conf : 9 0 3 8 8 7 7 6 5 4 1 1 3 4 5 7 6 3 2 3 4 7 9 8 7 5 1 2 1 2 1 2 4 5 7 8 8 7 6 6 3 1 2 4 5 7 7 6 8 9 8 7 1 3 5 5 6 5 5  
Pred : C C H H H H H H H H C C C C C C C C C C C C C C H H H H H H H H H H H H C C C C C C C C C C H H H H H H  
AA : L R T E Q A Q Q E E S D S I N D N K D I Q Q Q P E Q P A A M H S E G L V R A A H S L T H D I S H S E P G Y S V R R E M

Conf : 4 2 1 0 2 7 9  
Pred : H H H C C C C  
AA : Y H R E S R S

D, Drosophila wil.

JPRED

QUERY : ATVSSTKVQTALPTVDDDAVQRAVEDVAAAVAHQEAEPPQVQHFMTHDLGHRSSFSLRREFAHSHATKEGRN : QUERY  
UniRef90\_Q0IFC5 : ATISNSPQSTALPTVDDEAVQRAVEEVAAAVAHQEAEPKMQHILSHDTGHSEPTFSVRREIYG----- : UniRef90\_Q0IFC5  
UniRef90\_Q7QCS9 : -----SPQPTALPTVDDEAVQRAVEEVAAAVAHQEAEPKMQHVLAHDIGHGEP----- : UniRef90\_Q7QCS9

OrigSeq : 1-----11-----21-----31-----41-----51-----61-----71 : OrigSeq  
ATVSSTKVQTALPTVDDDAVQRAVEDVAAAVAHQEAEPPQVQHFMTHDLGHRSSFSLRREFAHSHATKEGRN

Jnet : -----HHHHHHHHHHHHHHHH-----HHHH-----EHHHHHH----- : Jnet  
jhmm : -----HHHHHHHHHHHHHHHH-----HHHH-----EEEHHHH----- : jhmm  
jpssm : -----EEEE-----HHHHHHHHHHHHHHHH-----HHHHHH-----HHHHHHHH----- : jpssm

Lupas 14 : ----- : Lupas 14  
Lupas 21 : ----- : Lupas 21  
Lupas 28 : ----- : Lupas 28

Jnet\_25 : --B-----BBBBB--BB--BB--BBBBBB--B--B--BB-B-B-----B-BB--BB----- : Jnet\_25  
Jnet\_5 : -----B-----B-----B-----B----- : Jnet\_5  
Jnet\_0 : ----- : Jnet\_0  
Jnet\_Rel : 998887610000455701789999758998720257600554320678888763000076533677777888 : Jnet\_Rel

PSIPRED

Conf : 9 4 1 3 6 6 5 2 0 2 4 6 7 6 6 7 6 9 9 9 9 9 9 9 9 9 9 9 9 6 4 1 3 1 1 2 1 1 3 5 5 6 5 4 1 2 6 8 8 8 8 7 3 1 3 4 3 5  
Pred : C C C C C C C C C C C C C C C C H H H H H H H H H H H H H H H H H H C C H H H H H H H H H H C C C C C C C C H H H H H H  
AA : A T V S S T K V Q T A L P T V D D D A V Q R A V E D V A A A V A H Q E A E P Q V Q H F M T H D L G H R E S S F S L R R

Conf : 4 4 2 1 4 5 6 3 2 4 6 9 9  
Pred : H H H C C C C C C C C C C  
AA : E F A H S H A T K E G R N

E, Loligo

JPRED

QUERY : TEARPEQQEDIKTPGFDSETFEDERPAIAEQTIHDLPNHRKKGYIAHVQQQPMIADEVSLDNLANSCHAN : QUERY  
UniRef90\_Q06BR2 : TEARPEQQEDIKTPGFDSETFEDERPAIAEQTIHDLPNHRKKGYIAHVQQQPMIADEVSLDNLANSCHAN : UniRef90\_Q06BR2

OrigSeq : 1-----11-----21-----31-----41-----51-----61----- : OrigSeq  
TEARPEQQEDIKTPGFDSETFEDERPAIAEQTIHDLPNHRKKGYIAHVQQQPMIADEVSLDNLANSCHAN

Jnet : -----HHHHH-----EEEE----- : Jnet  
jhmm : -----HHHH-----EEEE----- : jhmm  
jpssm : -----HHHHH-----H-EE----- : jpssm

Lupas 14 : ----- : Lupas 14  
Lupas 21 : ----- : Lupas 21  
Lupas 28 : ----- : Lupas 28

Jnet\_25 : -----B--B--B--B-BB--BB--B-----BBB--B-----BB--B-B--BBB----- : Jnet\_25  
Jnet\_5 : -----B----- : Jnet\_5  
Jnet\_0 : ----- : Jnet\_0  
Jnet\_Rel : 9987642356777777777765677663066650046665000010005665334676456523567888 : Jnet\_Rel

PSIPRED

Conf : 9 8 8 8 2 0 0 0 0 3 6 8 9 9 9 9 8 8 7 4 4 4 3 3 1 1 4 5 6 6 6 5 4 0 5 9 8 8 7 6 4 3 2 0 0 1 0 0 0 3 6 3 0 0 1 0 1 0 1  
Pred : C C C C C C H H C C C C C C C C C C C C C C C C H H H H H H H H H H C C C C C C C C C C E E E C C C C C C C H H H H C C  
AA : T E A R P E Q Q E D I K T P G F D S E T F E D E R P A I A E Q T I H D L P N H R K K G Y I A H V Q Q Q P M I A D E V S

Conf : 0 0 1 2 1 1 1 3 5 8 9  
Pred : C H H H H H C C C C C  
AA : L D N L Y A N S H A N

JPRED

[illegible]

PSTPRED

[illegible]

**Key for JPRED:**

Colour code for alignment:

- Blue - Complete identity at a position
- Shades of red - The more red a position is, the higher the level of conservation of chemical properties of the amino acids
- Jnet - Final secondary structure prediction for query  
H:α-helix; E:β-strand

```
jalign      - Jnet alignment prediction
jhmm       - Jnet hmm profile prediction
jpssm      - Jnet PSIBLAST pssm profile prediction
```

Lupas - Lupas Coil prediction (window size of 14, 21 and 28)

Note on coiled coil predictions

- = less than 50% probability
- c = between 50% and 90% probability
- C = greater than 90% probability

- Jnet\_25 - Jnet prediction of burial, less than 25% solvent accesibility
- Jnet\_5 - Jnet prediction of burial, less than 5% exposure
- Jnet\_0 - Jnet prediction of burial, 0% exposure
- Jnet Rel - Jnet reliability of prediction accuracy, ranges from 0 to 9, bigger is better.

### Key for PSIPRED:

Conf: Confidence (0=low, 9=high)  
Pred: Predicted secondary structure (H=helix, E=strand, C=coil)  
AA: Target sequence
