# Supplementary material for: Positive Evolutionary Selection of an HD Motif on Alzheimer Precursor Protein Orthologues Suggests a Functional Role
Source: PubMed Central journal article supplement (PMC3271017; doi:10.1371/journal.pcbi.1002356), 2012-02-02
Supplement: pcbi.1002356.s002.pdf [file pcbi.1002356.s002.pdf]

|   | A      | R      | N      | D      | C      | Q      | E      | G      | H      | I      | L       | K      | M      | F      | P      | S      | T      | W      | Y      | V      |  | Σ        | Σ of diads |
|---|--------|--------|--------|--------|--------|--------|--------|--------|--------|--------|---------|--------|--------|--------|--------|--------|--------|--------|--------|--------|--|----------|------------|
| A | 80201  | 41894  | 22110  | 32084  | 16276  | 36536  | 53525  | 55469  | 17877  | 30831  | 81987   | 37325  | 15519  | 31403  | 49846  | 65054  | 41046  | 9458   | 17328  | 53479  |  | 789248   |            |
| R | 44809  | 49564  | 23892  | 30773  | 14123  | 29084  | 44752  | 41562  | 18158  | 27289  | 61124   | 41171  | 11884  | 21010  | 37381  | 47404  | 31304  | 8029   | 16562  | 35360  |  | 635235   |            |
| N | 22532  | 20334  | 16744  | 16642  | 9479   | 18441  | 24677  | 26884  | 10646  | 23374  | 42163   | 24244  | 9155   | 16462  | 24427  | 34741  | 21502  | 5097   | 12479  | 24180  |  | 404203   |            |
| D | 31821  | 26995  | 18498  | 28349  | 12069  | 20043  | 37534  | 36610  | 12630  | 28320  | 55007   | 27180  | 11318  | 23500  | 32521  | 46477  | 27394  | 7040   | 15907  | 34178  |  | 533391   |            |
| C | 14535  | 15240  | 9614   | 11705  | 8471   | 12830  | 15313  | 22835  | 7778   | 10526  | 24966   | 13765  | 4185   | 9703   | 16267  | 23120  | 12560  | 3485   | 6848   | 14822  |  | 258568   |            |
| Q | 39920  | 34279  | 20582  | 26071  | 11180  | 34093  | 44456  | 32741  | 14986  | 21896  | 53332   | 33131  | 11296  | 15233  | 32272  | 35020  | 25694  | 6132   | 12503  | 31346  |  | 536163   |            |
| E | 59432  | 44803  | 35038  | 49209  | 18499  | 35117  | 89577  | 47134  | 16769  | 34547  | 71495   | 61651  | 17496  | 22554  | 37606  | 48457  | 37832  | 8033   | 17365  | 46396  |  | 799010   |            |
| G | 52672  | 42501  | 26562  | 34824  | 15421  | 31755  | 48877  | 58831  | 19460  | 30614  | 67970   | 44551  | 13449  | 27448  | 50866  | 66255  | 40783  | 8839   | 19490  | 39752  |  | 740920   |            |
| H | 14881  | 18336  | 9647   | 9682   | 8334   | 16038  | 15079  | 17845  | 10522  | 13720  | 33846   | 14756  | 6131   | 12474  | 18940  | 26559  | 19396  | 4048   | 9101   | 16668  |  | 296003   |            |
| I | 28135  | 25994  | 19945  | 21774  | 12551  | 25327  | 27623  | 24100  | 16811  | 26763  | 51575   | 28367  | 10183  | 21488  | 29178  | 41404  | 28743  | 5867   | 15544  | 27484  |  | 488856   |            |
| L | 78295  | 67801  | 38975  | 52350  | 25243  | 64966  | 80235  | 67983  | 30945  | 43946  | 125506  | 63560  | 20290  | 38388  | 68558  | 90532  | 58453  | 13225  | 28912  | 62888  |  | 1121051  |            |
| K | 45823  | 36612  | 26260  | 34274  | 14220  | 28549  | 56450  | 35888  | 15855  | 30898  | 56620   | 51969  | 14892  | 19006  | 36750  | 43519  | 34683  | 6811   | 17228  | 38025  |  | 644332   |            |
| M | 22234  | 11522  | 9864   | 13659  | 4445   | 10113  | 20469  | 14490  | 5225   | 9279   | 22130   | 15891  | 5733   | 8079   | 12358  | 17431  | 12398  | 2748   | 6601   | 15197  |  | 239866   |            |
| F | 22108  | 22378  | 15205  | 18265  | 10915  | 20734  | 21962  | 24886  | 11989  | 20651  | 47140   | 19877  | 7758   | 18140  | 22931  | 39758  | 23365  | 5665   | 13809  | 23937  |  | 411473   |            |
| P | 56901  | 39383  | 20010  | 31369  | 13625  | 32550  | 51433  | 62332  | 16324  | 21156  | 60378   | 31628  | 10873  | 22099  | 70293  | 64364  | 35296  | 8229   | 18843  | 42496  |  | 709582   |            |
| S | 60134  | 51089  | 30051  | 42727  | 21859  | 44038  | 57644  | 64331  | 25016  | 35656  | 92888   | 44704  | 15956  | 34966  | 67237  | 106074 | 50883  | 12451  | 23947  | 54176  |  | 935827   |            |
| T | 42508  | 27733  | 19149  | 26671  | 15363  | 26187  | 39089  | 42240  | 15983  | 26711  | 60529   | 29072  | 11301  | 24258  | 41132  | 52317  | 35661  | 8013   | 15842  | 43089  |  | 602848   |            |
| W | 9507   | 8466   | 6024   | 7396   | 2770   | 6179   | 9490   | 8509   | 3415   | 6264   | 13916   | 9208   | 3274   | 5071   | 6176   | 10004  | 7613   | 2208   | 3813   | 8117   |  | 137420   |            |
| Y | 15599  | 17955  | 12243  | 14141  | 7729   | 14143  | 19380  | 18907  | 8447   | 15130  | 30353   | 17265  | 6047   | 13978  | 14799  | 24764  | 16676  | 4245   | 10630  | 17787  |  | 300218   |            |
| V | 48291  | 33471  | 24572  | 32356  | 16654  | 30370  | 42396  | 38041  | 17860  | 32199  | 70363   | 36525  | 13492  | 27153  | 41102  | 54610  | 42524  | 8017   | 18058  | 44422  |  | 672476   |            |
| Σ | 790338 | 636350 | 404985 | 534321 | 259226 | 537093 | 799961 | 741618 | 296696 | 489770 | 1123288 | 645840 | 220232 | 412413 | 710640 | 937864 | 603806 | 137640 | 300810 | 673799 |  | 11256690 | 11256690   |

|   | A      | R      | N      | D      | C      | Q      | E      | G      | H      | I      | L      | K      | M      | F      | P      | S      | T      | W      | Y      | V      |  |
|---|--------|--------|--------|--------|--------|--------|--------|--------|--------|--------|--------|--------|--------|--------|--------|--------|--------|--------|--------|--------|--|
| A | 0.370  | -0.063 | -0.250 | -0.155 | -0.110 | -0.030 | -0.047 | 0.065  | -0.152 | -0.108 | 0.040  | -0.193 | 0.005  | 0.083  | 0.000  | -0.011 | -0.031 | -0.020 | -0.197 | 0.124  |  |
| R | 0.005  | 0.322  | 0.044  | 0.020  | -0.035 | -0.041 | -0.009 | -0.007 | 0.081  | -0.013 | -0.036 | 0.122  | -0.045 | -0.102 | -0.070 | -0.110 | -0.085 | 0.033  | -0.025 | -0.073 |  |
| N | -0.231 | -0.117 | 0.141  | -0.142 | 0.018  | -0.045 | -0.152 | 0.009  | -0.001 | 0.284  | 0.044  | 0.044  | 0.146  | 0.106  | -0.044 | 0.031  | -0.008 | 0.031  | 0.144  | -0.001 |  |
| D | -0.163 | -0.111 | -0.037 | 0.113  | -0.018 | -0.239 | -0.010 | 0.041  | -0.107 | 0.199  | 0.033  | -0.119 | 0.081  | 0.184  | -0.035 | 0.045  | -0.043 | 0.076  | 0.110  | 0.068  |  |
| C | -0.222 | 0.042  | 0.033  | -0.047 | 0.353  | 0.039  | -0.182 | 0.293  | 0.132  | -0.067 | -0.033 | -0.075 | -0.190 | 0.024  | -0.003 | 0.071  | -0.099 | 0.097  | -0.009 | -0.043 |  |
| Q | 0.059  | 0.123  | 0.065  | 0.024  | -0.099 | 0.287  | 0.154  | -0.076 | 0.059  | -0.063 | -0.003 | 0.074  | 0.074  | -0.254 | -0.048 | -0.243 | -0.113 | -0.067 | -0.136 | -0.024 |  |
| E | 0.058  | -0.008 | 0.198  | 0.260  | 0.005  | -0.082 | 0.456  | -0.110 | -0.228 | -0.006 | -0.109 | 0.296  | 0.113  | -0.261 | -0.294 | -0.318 | -0.125 | -0.196 | -0.207 | -0.030 |  |
| G | 0.012  | 0.015  | -0.004 | -0.010 | -0.101 | -0.107 | -0.074 | 0.187  | -0.004 | -0.052 | -0.084 | 0.047  | -0.075 | 0.011  | 0.084  | 0.071  | 0.026  | -0.025 | -0.016 | -0.109 |  |
| H | -0.334 | 0.091  | -0.099 | -0.372 | 0.201  | 0.127  | -0.333 | -0.089 | 0.299  | 0.063  | 0.136  | -0.141 | 0.057  | 0.140  | 0.013  | 0.074  | 0.200  | 0.112  | 0.140  | -0.061 |  |
| I | -0.199 | -0.061 | 0.126  | -0.064 | 0.109  | 0.082  | -0.229 | -0.290 | 0.266  | 0.230  | 0.056  | 0.011  | 0.063  | 0.182  | -0.056 | 0.016  | 0.092  | -0.019 | 0.174  | -0.063 |  |
| L | -0.005 | 0.068  | -0.034 | -0.016 | -0.022 | 0.194  | 0.007  | -0.083 | 0.046  | -0.104 | 0.115  | -0.012 | -0.078 | -0.068 | -0.032 | -0.031 | -0.028 | -0.036 | -0.036 | -0.065 |  |
| K | 0.013  | 0.005  | 0.125  | 0.114  | -0.043 | -0.074 | 0.209  | -0.168 | -0.069 | 0.097  | -0.127 | 0.341  | 0.167  | -0.217 | -0.102 | -0.210 | 0.004  | -0.146 | 0.001  | -0.014 |  |
| M | 0.278  | -0.163 | 0.134  | 0.182  | -0.217 | -0.124 | 0.183  | -0.087 | -0.191 | -0.118 | -0.078 | 0.144  | 0.200  | -0.084 | -0.203 | -0.137 | -0.037 | -0.065 | 0.029  | 0.057  |  |
| F | -0.268 | -0.039 | 0.027  | -0.067 | 0.141  | 0.055  | -0.286 | -0.086 | 0.100  | 0.143  | 0.138  | -0.172 | -0.037 | 0.185  | -0.125 | 0.148  | 0.057  | 0.119  | 0.228  | -0.029 |  |
| P | 0.133  | -0.018 | -0.244 | -0.071 | -0.182 | -0.039 | 0.020  | 0.288  | -0.136 | -0.378 | -0.159 | -0.252 | -0.244 | -0.162 | 0.451  | 0.085  | -0.075 | -0.053 | -0.006 | 0.001  |  |
| S | -0.089 | -0.035 | -0.114 | -0.039 | 0.014  | -0.014 | -0.143 | 0.042  | 0.014  | -0.133 | -0.005 | -0.183 | -0.138 | 0.020  | 0.129  | 0.308  | 0.014  | 0.084  | -0.043 | -0.033 |  |
| T | 0.004  | -0.206 | -0.125 | -0.070 | 0.101  | -0.094 | -0.092 | 0.062  | 0.006  | 0.018  | 0.006  | -0.174 | -0.043 | 0.094  | 0.078  | 0.041  | 0.098  | 0.083  | -0.017 | 0.177  |  |
| W | -0.015 | 0.086  | 0.198  | 0.126  | -0.133 | -0.059 | -0.029 | -0.062 | -0.059 | 0.047  | 0.015  | 0.155  | 0.197  | 0.007  | -0.340 | -0.135 | 0.032  | 0.273  | 0.038  | -0.013 |  |
| Y | -0.301 | 0.056  | 0.125  | -0.008 | 0.111  | -0.013 | -0.096 | -0.045 | 0.065  | 0.147  | 0.013  | 0.002  | 0.029  | 0.240  | -0.247 | -0.010 | 0.035  | 0.145  | 0.281  | -0.010 |  |
| V | 0.023  | -0.127 | 0.016  | 0.014  | 0.073  | -0.055 | -0.120 | -0.152 | 0.008  | 0.096  | 0.047  | -0.055 | 0.025  | 0.097  | -0.032 | -0.026 | 0.165  | -0.025 | 0.005  | 0.099  |  |

Homo sapiens

|   | A      | R     | N     | D     | C     | Q     | E      | G     | H     | I     | L      | K      | M     | F     | P     | S      | T     | W     | Y     | V      |  | Σ       | Σ of diads |
|---|--------|-------|-------|-------|-------|-------|--------|-------|-------|-------|--------|--------|-------|-------|-------|--------|-------|-------|-------|--------|--|---------|------------|
| A | 9405   | 5615  | 4663  | 5741  | 1910  | 4567  | 7241   | 6076  | 2370  | 6422  | 9134   | 6835   | 2632  | 4356  | 5668  | 8275   | 6236  | 928   | 2945  | 7310   |  | 108329  |            |
| R | 5424   | 6512  | 4513  | 4819  | 1693  | 3945  | 5658   | 4583  | 2231  | 5308  | 7566   | 6422   | 2183  | 3780  | 3823  | 6367   | 4466  | 975   | 2618  | 5298   |  | 88184   |            |
| N | 4900   | 4125  | 3833  | 4247  | 1541  | 3303  | 5317   | 5481  | 1720  | 4443  | 6601   | 4305   | 1770  | 3471  | 3730  | 5993   | 3925  | 887   | 2672  | 5275   |  | 77539   |            |
| D | 6094   | 4657  | 3827  | 7189  | 1597  | 3400  | 8157   | 6357  | 1933  | 5212  | 7570   | 5177   | 2144  | 4130  | 4046  | 6761   | 4266  | 1133  | 3045  | 6396   |  | 93091   |            |
| C | 1938   | 1838  | 1419  | 1893  | 735   | 1342  | 2062   | 2161  | 812   | 1860  | 2636   | 1868   | 542   | 1419  | 1631  | 2554   | 1698  | 347   | 932   | 1913   |  | 31600   |            |
| Q | 4144   | 3740  | 3520  | 2788  | 1484  | 4727  | 4083   | 2854  | 1604  | 4085  | 6784   | 4907   | 2149  | 3101  | 3231  | 4699   | 3595  | 812   | 2143  | 3821   |  | 68271   |            |
| E | 7187   | 5720  | 6069  | 6840  | 1977  | 4862  | 10313  | 4879  | 2604  | 6718  | 9208   | 9997   | 3088  | 4280  | 4097  | 7152   | 6085  | 1307  | 3407  | 6349   |  | 112139  |            |
| G | 6110   | 5042  | 4582  | 5081  | 1727  | 3689  | 5834   | 7229  | 2210  | 5072  | 6758   | 6071   | 2343  | 4282  | 4074  | 7178   | 5269  | 1068  | 3334  | 5722   |  | 92675   |            |
| H | 2223   | 2229  | 1581  | 1915  | 845   | 1729  | 2310   | 2188  | 1383  | 2170  | 3642   | 1875   | 849   | 1891  | 2025  | 2716   | 1936  | 438   | 1430  | 2578   |  | 37953   |            |
| I | 6429   | 5400  | 4241  | 6036  | 1957  | 3864  | 6534   | 5448  | 2290  | 5652  | 8294   | 5171   | 1959  | 4475  | 4976  | 7520   | 5174  | 1100  | 3020  | 6347   |  | 95887   |            |
| L | 9754   | 7745  | 6669  | 7540  | 2623  | 5783  | 9384   | 6827  | 3364  | 8188  | 13177  | 9357   | 3247  | 6202  | 7285  | 10489  | 7688  | 1388  | 3884  | 8549   |  | 139143  |            |
| K | 6280   | 6167  | 5455  | 5505  | 2127  | 4081  | 7591   | 4440  | 2297  | 6530  | 9075   | 9840   | 3002  | 4204  | 4527  | 7464   | 6253  | 1350  | 3418  | 6204   |  | 105810  |            |
| M | 2981   | 2307  | 2182  | 2342  | 826   | 1775  | 2888   | 2087  | 901   | 2526  | 3627   | 2953   | 1355  | 1945  | 1986  | 3727   | 2583  | 432   | 1211  | 2469   |  | 43103   |            |
| F | 4419   | 3563  | 3433  | 4577  | 1534  | 2831  | 4629   | 4725  | 1733  | 4022  | 6378   | 3642   | 1592  | 3541  | 2998  | 5599   | 3577  | 894   | 2546  | 4997   |  | 71230   |            |
| P | 5163   | 3770  | 3613  | 4184  | 1153  | 3272  | 5297   | 5068  | 1687  | 4605  | 6133   | 4715   | 1858  | 3104  | 5726  | 6937   | 5547  | 680   | 2112  | 4823   |  | 79447   |            |
| S | 8499   | 6513  | 5914  | 7231  | 2352  | 5049  | 7912   | 7685  | 2682  | 7298  | 10214  | 7354   | 2960  | 5234  | 6307  | 13515  | 8597  | 1222  | 3613  | 7621   |  | 127772  |            |
| T | 6359   | 4218  | 4125  | 5139  | 1985  | 3122  | 5713   | 5243  | 1964  | 5780  | 7657   | 5124   | 2093  | 4003  | 5272  | 8340   | 6589  | 1049  | 2706  | 6675   |  | 93156   |            |
| W | 1068   | 1021  | 1060  | 996   | 347   | 741   | 1008   | 856   | 437   | 1155  | 1632   | 1422   | 584   | 821   | 653   | 1311   | 1102  | 238   | 553   | 971    |  | 17976   |            |
| Y | 2911   | 2811  | 2456  | 3086  | 1111  | 2217  | 3198   | 3203  | 1339  | 2820  | 4254   | 2747   | 1225  | 2483  | 2386  | 3845   | 2779  | 652   | 1998  | 3105   |  | 50626   |            |
| V | 7254   | 5334  | 4599  | 6105  | 2157  | 4145  | 7230   | 5355  | 2504  | 6230  | 9104   | 6361   | 2258  | 4750  | 5094  | 7521   | 5887  | 1134  | 3183  | 7164   |  | 103369  |            |
| Σ | 108542 | 88327 | 77754 | 93254 | 31681 | 68444 | 112359 | 92745 | 38065 | 96096 | 139444 | 106143 | 39833 | 71472 | 79535 | 127963 | 93252 | 18034 | 50770 | 103587 |  | 1637300 | 1637300    |

|   | A      | R      | N      | D      | C      | Q      | E      | G      | H      | I      | L      | K      | M      | F      | P      | S      | T      | W      | Y      | V      |  |
|---|--------|--------|--------|--------|--------|--------|--------|--------|--------|--------|--------|--------|--------|--------|--------|--------|--------|--------|--------|--------|--|
| A | 0.270  | -0.040 | -0.098 | -0.072 | -0.093 | 0.008  | -0.026 | -0.010 | -0.061 | 0.010  | -0.010 | -0.027 | -0.001 | -0.082 | 0.074  | -0.023 | 0.011  | -0.251 | -0.132 | 0.064  |  |
| R | -0.075 | 0.314  | 0.075  | -0.041 | -0.008 | 0.068  | -0.067 | -0.086 | 0.085  | 0.025  | 0.007  | 0.116  | 0.017  | -0.018 | -0.114 | -0.079 | -0.117 | 0.004  | -0.044 | -0.052 |  |
| N | -0.048 | -0.014 | 0.040  | -0.039 | 0.027  | 0.019  | -0.001 | 0.221  | -0.047 | -0.024 | 0.000  | -0.155 | -0.064 | 0.025  | -0.010 | -0.011 | -0.118 | 0.038  | 0.106  | 0.073  |  |
| D | -0.013 | -0.075 | -0.144 | 0.304  | -0.120 | -0.135 | 0.244  | 0.187  | -0.113 | -0.047 | -0.046 | -0.153 | -0.055 | 0.016  | -0.111 | -0.073 | -0.217 | 0.100  | 0.053  | 0.082  |  |
| C | -0.078 | 0.075  | -0.056 | 0.050  | 0.184  | 0.016  | -0.050 | 0.188  | 0.100  | 0.003  | -0.021 | -0.092 | -0.350 | 0.028  | 0.061  | 0.034  | -0.058 | -0.003 | -0.050 | -0.044 |  |
| Q | -0.088 | 0.015  | 0.082  | -0.333 | 0.116  | 0.505  | -0.138 | -0.304 | 0.011  | 0.019  | 0.154  | 0.103  | 0.258  | 0.040  | -0.026 | -0.127 | -0.078 | 0.077  | 0.012  | -0.123 |  |
| E | -0.034 | -0.056 | 0.131  | 0.069  | -0.093 | 0.036  | 0.293  | -0.264 | -0.001 | 0.021  | -0.037 | 0.319  | 0.124  | -0.134 | -0.285 | -0.203 | -0.048 | 0.057  | -0.020 | -0.111 |  |
| G | -0.006 | 0.008  | 0.040  | -0.038 | -0.038 | -0.049 | -0.086 | 0.320  | 0.025  | -0.070 | -0.155 | 0.010  | 0.038  | 0.057  | -0.100 | -0.009 | -0.002 | 0.045  | 0.149  | -0.024 |  |
| H | -0.124 | 0.085  | -0.131 | -0.121 | 0.140  | 0.086  | -0.120 | 0.018  | 0.449  | -0.026 | 0.119  | -0.272 | -0.084 | 0.132  | 0.094  | -0.088 | -0.110 | 0.047  | 0.195  | 0.071  |  |
| I | 0.011  | 0.043  | -0.071 | 0.100  | 0.053  | -0.037 | -0.007 | 0.003  | 0.027  | 0.004  | 0.016  | -0.184 | -0.175 | 0.067  | 0.066  | 0.003  | -0.054 | 0.041  | 0.016  | 0.045  |  |
| L | 0.056  | 0.031  | 0.009  | -0.050 | -0.026 | -0.006 | -0.017 | -0.144 | 0.039  | 0.003  | 0.106  | 0.037  | -0.042 | 0.021  | 0.075  | -0.036 | -0.030 | -0.099 | -0.105 | -0.029 |  |
| K | -0.111 | 0.077  | 0.082  | -0.091 | 0.038  | -0.081 | 0.044  | -0.300 | -0.069 | 0.050  | 0.007  | 0.361  | 0.154  | -0.094 | -0.127 | -0.102 | 0.037  | 0.147  | 0.041  | -0.076 |  |
| M | 0.042  | -0.008 | 0.064  | -0.047 | -0.010 | -0.015 | -0.024 | -0.157 | -0.106 | -0.001 | -0.012 | 0.055  | 0.256  | 0.033  | -0.053 | 0.101  | 0.051  | -0.094 | -0.099 | -0.099 |  |
| F | -0.066 | -0.076 | 0.015  | 0.121  | 0.107  | -0.050 | -0.054 | 0.158  | 0.045  | -0.039 | 0.050  | -0.237 | -0.085 | 0.130  | -0.143 | 0.006  | -0.126 | 0.131  | 0.142  | 0.103  |  |
| P | -0.020 | -0.128 | -0.043 | -0.078 | -0.288 | -0.015 | -0.029 | 0.119  | -0.091 | -0.012 | -0.098 | -0.088 | -0.039 | -0.111 | 0.395  | 0.111  | 0.204  | -0.252 | -0.154 | -0.041 |  |
| S | 0.003  | -0.057 | -0.026 | -0.006 | -0.050 | -0.056 | -0.103 | 0.060  | -0.102 | -0.027 | -0.063 | -0.119 | -0.049 | -0.064 | 0.016  | 0.303  | 0.167  | -0.141 | -0.092 | -0.059 |  |
| T | 0.029  | -0.175 | -0.070 | -0.032 | 0.096  | -0.221 | -0.112 | -0.006 | -0.098 | 0.056  | -0.036 | -0.164 | -0.080 | -0.016 | 0.153  | 0.136  | 0.217  | 0.022  | -0.065 | 0.124  |  |
| W | -0.110 | 0.052  | 0.216  | -0.028 | -0.002 | -0.014 | -0.202 | -0.174 | 0.045  | 0.091  | 0.064  | 0.199  | 0.289  | 0.045  | -0.291 | -0.069 | 0.074  | 0.184  | -0.008 | -0.158 |  |
| Y | -0.142 | 0.029  | 0.021  | 0.068  | 0.126  | 0.046  | -0.083 | 0.111  | 0.129  | -0.052 | -0.013 | -0.178 | -0.005 | 0.117  | -0.030 | -0.029 | -0.037 | 0.156  | 0.241  | -0.031 |  |
| V | 0.057  | -0.044 | -0.065 | 0.036  | 0.075  | -0.042 | 0.019  | -0.089 | 0.041  | 0.027  | 0.034  | -0.052 | -0.108 | 0.051  | 0.014  | -0.072 | 0.000  | -0.004 | -0.007 | 0.091  |  |

C. elegans

|   | A      | R      | N     | D     | C     | Q     | E      | G      | H     | I     | L      | K      | M     | F     | P     | S      | T      | W     | Y     | V      |  | Σ       | Σ of diads |
|---|--------|--------|-------|-------|-------|-------|--------|--------|-------|-------|--------|--------|-------|-------|-------|--------|--------|-------|-------|--------|--|---------|------------|
| A | 17231  | 6212   | 6088  | 6438  | 2127  | 6416  | 8749   | 9143   | 3183  | 6616  | 12027  | 7905   | 3195  | 4360  | 7293  | 11452  | 8853   | 1124  | 3366  | 8514   |  | 140292  |            |
| R | 6027   | 7903   | 5046  | 5274  | 1900  | 5364  | 6729   | 5349   | 2840  | 5387  | 9952   | 6716   | 2316  | 3933  | 4796  | 8004   | 5180   | 1052  | 3070  | 5431   |  | 102269  |            |
| N | 6094   | 4172   | 5779  | 4165  | 1769  | 3880  | 5168   | 6493   | 2080  | 4829  | 7694   | 4429   | 2092  | 3374  | 4439  | 7794   | 4433   | 978   | 2857  | 5441   |  | 87960   |            |
| D | 6768   | 4691   | 4275  | 7277  | 1740  | 3753  | 8087   | 5967   | 2108  | 5581  | 9322   | 5351   | 2297  | 4275  | 4608  | 7286   | 4642   | 1129  | 3423  | 6290   |  | 98870   |            |
| C | 2117   | 1964   | 1579  | 1954  | 845   | 1523  | 1978   | 2342   | 870   | 1790  | 3199   | 1799   | 619   | 1364  | 1647  | 2793   | 1643   | 348   | 1052  | 2080   |  | 33506   |            |
| Q | 6524   | 6205   | 4042  | 3823  | 1454  | 14432 | 5833   | 3976   | 3588  | 4358  | 10068  | 5120   | 2448  | 3077  | 5152  | 6502   | 4660   | 899   | 2337  | 4863   |  | 99361   |            |
| E | 8668   | 7408   | 5457  | 7668  | 2016  | 6508  | 11435  | 5451   | 3045  | 6431  | 11672  | 8078   | 2884  | 4242  | 5087  | 7997   | 6114   | 1094  | 3393  | 6899   |  | 121547  |            |
| G | 8536   | 5722   | 5826  | 5886  | 1847  | 4992  | 6161   | 12774  | 3088  | 5522  | 8998   | 6330   | 2521  | 4129  | 4777  | 11152  | 6012   | 1133  | 3762  | 6953   |  | 116121  |            |
| H | 2949   | 2635   | 2237  | 2091  | 1045  | 3237  | 2526   | 2801   | 2952  | 2479  | 4991   | 2490   | 1187  | 1962  | 2939  | 3935   | 2478   | 584   | 1613  | 2708   |  | 49839   |            |
| I | 6411   | 5016   | 4719  | 5237  | 2072  | 4123  | 5972   | 5003   | 2201  | 5052  | 8422   | 5671   | 2030  | 4012  | 4401  | 7527   | 5206   | 984   | 3328  | 6038   |  | 93425   |            |
| L | 12818  | 10348  | 8002  | 9554  | 3083  | 9753  | 11510  | 9429   | 4730  | 8183  | 17499  | 10408  | 3732  | 5874  | 9342  | 12867  | 9099   | 1672  | 4809  | 9745   |  | 172457  |            |
| K | 6840   | 6991   | 4671  | 5799  | 2037  | 5402  | 7588   | 4791   | 2667  | 5690  | 10215  | 8502   | 2541  | 3708  | 5753  | 7865   | 5724   | 1111  | 3410  | 6276   |  | 107581  |            |
| M | 3616   | 2712   | 1935  | 2618  | 821   | 2492  | 3098   | 2806   | 1207  | 1892  | 4239   | 2371   | 1283  | 1544  | 2527  | 3588   | 2306   | 441   | 1235  | 2648   |  | 45379   |            |
| F | 4376   | 3575   | 3309  | 4088  | 1375  | 2938  | 4183   | 4708   | 1689  | 3450  | 6435   | 3775   | 1611  | 2820  | 2836  | 5038   | 3570   | 808   | 2392  | 4644   |  | 67620   |            |
| P | 7927   | 4561   | 4466  | 4627  | 1373  | 5095  | 6508   | 5964   | 2774  | 4364  | 8360   | 5502   | 2082  | 3114  | 8917  | 8231   | 6356   | 812   | 2664  | 5818   |  | 99515   |            |
| S | 11523  | 7344   | 7561  | 7445  | 2588  | 6609  | 8221   | 11326  | 3640  | 6959  | 12827  | 7821   | 3191  | 4847  | 8852  | 18884  | 9447   | 1311  | 4057  | 8729   |  | 153182  |            |
| T | 8434   | 4558   | 4610  | 4863  | 1803  | 4300  | 6001   | 6396   | 2494  | 5302  | 9349   | 5496   | 2205  | 3652  | 7186  | 9075   | 8122   | 952   | 2894  | 6391   |  | 104083  |            |
| W | 1039   | 1226   | 891   | 947   | 354   | 964   | 1024   | 941    | 585   | 986   | 2034   | 1067   | 424   | 833   | 744   | 1522   | 1028   | 274   | 647   | 964    |  | 18494   |            |
| Y | 3749   | 3179   | 2741  | 3231  | 1216  | 2524  | 3559   | 3642   | 1476  | 2873  | 5098   | 2932   | 1295  | 2506  | 2446  | 3934   | 2912   | 676   | 2105  | 3366   |  | 55460   |            |
| V | 8852   | 5965   | 4936  | 6076  | 2091  | 5222  | 7389   | 6935   | 2725  | 5801  | 10326  | 6133   | 2398  | 4151  | 5850  | 7986   | 6421   | 1149  | 3194  | 7618   |  | 111218  |            |
| Σ | 140499 | 102387 | 88170 | 99061 | 33556 | 99527 | 121719 | 116237 | 49942 | 93545 | 172727 | 107896 | 42351 | 67777 | 99592 | 153432 | 104206 | 18531 | 55608 | 111416 |  | 1878179 | 1878179    |

|   | A      | R      | N      | D      | C      | Q      | E      | G      | H      | I      | L      | K      | M      | F      | P      | S      | T      | W      | Y      | V      |  |
|---|--------|--------|--------|--------|--------|--------|--------|--------|--------|--------|--------|--------|--------|--------|--------|--------|--------|--------|--------|--------|--|
| A | 0.496  | -0.208 | -0.079 | -0.139 | -0.164 | -0.147 | -0.038 | 0.052  | -0.159 | -0.055 | -0.070 | -0.019 | 0.010  | -0.149 | -0.020 | -0.001 | 0.129  | -0.208 | -0.210 | 0.023  |  |
| R | -0.238 | 0.349  | 0.050  | -0.022 | 0.039  | -0.010 | 0.015  | -0.168 | 0.043  | 0.056  | 0.057  | 0.134  | 0.004  | 0.064  | -0.123 | -0.043 | -0.091 | 0.042  | 0.014  | -0.111 |  |
| N | -0.077 | -0.139 | 0.336  | -0.108 | 0.118  | -0.183 | -0.098 | 0.176  | -0.117 | 0.097  | -0.050 | -0.132 | 0.053  | 0.061  | -0.049 | 0.081  | -0.096 | 0.119  | 0.093  | 0.042  |  |
| D | -0.089 | -0.139 | -0.082 | 0.333  | -0.015 | -0.334 | 0.233  | -0.025 | -0.221 | 0.125  | 0.025  | -0.060 | 0.030  | 0.181  | -0.129 | -0.103 | -0.167 | 0.146  | 0.156  | 0.070  |  |
| C | -0.169 | 0.073  | 0.004  | 0.100  | 0.345  | -0.153 | -0.093 | 0.122  | -0.024 | 0.070  | 0.037  | -0.068 | -0.199 | 0.121  | -0.076 | 0.020  | -0.124 | 0.051  | 0.059  | 0.045  |  |
| Q | -0.130 | 0.136  | -0.143 | -0.315 | -0.200 | 1.008  | -0.099 | -0.436 | 0.306  | -0.127 | 0.097  | -0.109 | 0.089  | -0.153 | -0.022 | -0.222 | -0.168 | -0.087 | -0.230 | -0.192 |  |
| E | -0.048 | 0.112  | -0.045 | 0.179  | -0.074 | 0.010  | 0.373  | -0.322 | -0.060 | 0.060  | 0.043  | 0.146  | 0.051  | -0.033 | -0.237 | -0.216 | -0.098 | -0.092 | -0.059 | -0.044 |  |
| G | -0.017 | -0.101 | 0.066  | -0.040 | -0.116 | -0.209 | -0.200 | 0.575  | 0.000  | -0.046 | -0.171 | -0.052 | -0.038 | -0.015 | -0.254 | 0.162  | -0.069 | -0.011 | 0.090  | 0.009  |  |
| H | -0.234 | -0.031 | -0.045 | -0.229 | 0.160  | 0.203  | -0.246 | -0.096 | 0.801  | -0.001 | 0.085  | -0.140 | 0.055  | 0.087  | 0.106  | -0.034 | -0.110 | 0.172  | 0.089  | -0.088 |  |
| I | -0.086 | -0.015 | 0.073  | 0.061  | 0.216  | -0.183 | -0.014 | -0.145 | -0.121 | 0.082  | -0.020 | 0.055  | -0.037 | 0.174  | -0.118 | -0.014 | 0.004  | 0.065  | 0.185  | 0.086  |  |
| L | -0.006 | 0.096  | -0.012 | 0.049  | 0.001  | 0.065  | 0.029  | -0.124 | 0.031  | -0.048 | 0.098  | 0.049  | -0.041 | -0.058 | 0.021  | -0.091 | -0.050 | -0.018 | -0.060 | -0.049 |  |
| K | -0.163 | 0.176  | -0.078 | 0.022  | 0.058  | -0.054 | 0.085  | -0.329 | -0.070 | 0.060  | 0.032  | 0.319  | 0.046  | -0.046 | 0.008  | -0.111 | -0.042 | 0.046  | 0.068  | -0.017 |  |
| M | 0.063  | 0.092  | -0.096 | 0.090  | 0.013  | 0.036  | 0.052  | -0.001 | 0.000  | -0.178 | 0.016  | -0.095 | 0.226  | -0.059 | 0.049  | -0.033 | -0.088 | -0.015 | -0.084 | -0.016 |  |
| F | -0.145 | -0.031 | 0.042  | 0.136  | 0.129  | -0.199 | -0.047 | 0.118  | -0.063 | 0.024  | 0.034  | -0.029 | 0.055  | 0.145  | -0.235 | -0.092 | -0.050 | 0.192  | 0.178  | 0.146  |  |
| P | 0.063  | -0.173 | -0.045 | -0.126 | -0.258 | -0.034 | 0.009  | -0.032 | 0.047  | -0.127 | -0.091 | -0.038 | -0.075 | -0.143 | 0.525  | 0.012  | 0.141  | -0.190 | -0.101 | -0.015 |  |
| S | 0.006  | -0.128 | 0.050  | -0.082 | -0.056 | -0.206 | -0.189 | 0.178  | -0.112 | -0.092 | -0.094 | -0.118 | -0.079 | -0.131 | 0.086  | 0.411  | 0.106  | -0.142 | -0.111 | -0.040 |  |
| T | 0.080  | -0.219 | -0.058 | -0.121 | -0.031 | -0.249 | -0.117 | -0.007 | -0.104 | 0.023  | -0.024 | -0.084 | -0.062 | -0.028 | 0.264  | 0.065  | 0.341  | -0.076 | -0.063 | 0.034  |  |
| W | -0.286 | 0.196  | 0.026  | -0.030 | 0.069  | -0.016 | -0.157 | -0.196 | 0.174  | 0.068  | 0.179  | 0.004  | 0.017  | 0.222  | -0.276 | 0.007  | 0.002  | 0.407  | 0.167  | -0.129 |  |
| Y | -0.101 | 0.050  | 0.051  | 0.099  | 0.205  | -0.152 | -0.010 | 0.059  | 0.001  | 0.039  | 0.000  | -0.083 | 0.035  | 0.225  | -0.184 | -0.141 | -0.055 | 0.211  | 0.248  | 0.023  |  |
| V | 0.062  | -0.016 | -0.056 | 0.035  | 0.051  | -0.121 | 0.025  | 0.008  | -0.082 | 0.046  | 0.010  | -0.041 | -0.045 | 0.034  | -0.008 | -0.129 | 0.040  | 0.046  | -0.030 | 0.144  |  |

Drosophyla melanogaster

|   | A      | R      | N      | D      | C     | Q      | E      | G      | H      | I      | L      | K      | M      | F      | P      | S      | T      | W     | Y      | V      |  | Σ       | Σ of diads |
|---|--------|--------|--------|--------|-------|--------|--------|--------|--------|--------|--------|--------|--------|--------|--------|--------|--------|-------|--------|--------|--|---------|------------|
| A | 26539  | 14645  | 11479  | 13134  | 5812  | 8317   | 17927  | 18681  | 5452   | 17163  | 29374  | 17551  | 7905   | 12791  | 11786  | 25150  | 16563  | 3289  | 8738   | 21746  |  | 294042  |            |
| R | 13960  | 17366  | 11352  | 12559  | 4730  | 7838   | 15497  | 14719  | 5321   | 13626  | 22936  | 16551  | 5338   | 11882  | 9766   | 19433  | 11040  | 3412  | 7069   | 16165  |  | 240560  |            |
| N | 11880  | 9749   | 11728  | 9373   | 3811  | 7770   | 10942  | 15802  | 5188   | 11631  | 21259  | 11133  | 4497   | 8538   | 11020  | 16648  | 9775   | 2648  | 6154   | 13737  |  | 203283  |            |
| D | 14729  | 10923  | 9461   | 16311  | 4254  | 8049   | 18341  | 17056  | 5626   | 13989  | 24188  | 12483  | 6028   | 11537  | 12069  | 18936  | 10616  | 3049  | 7740   | 17337  |  | 242722  |            |
| C | 4314   | 5066   | 3949   | 4287   | 2573  | 2477   | 4142   | 6752   | 2023   | 4593   | 8922   | 5753   | 1682   | 4316   | 4163   | 8143   | 4013   | 1057  | 2730   | 5646   |  | 86601   |            |
| Q | 9787   | 9332   | 7513   | 7358   | 2616  | 8702   | 10464  | 9336   | 3660   | 9058   | 14558  | 9456   | 3967   | 6247   | 7111   | 11748  | 8067   | 1910  | 4149   | 10165  |  | 155204  |            |
| E | 21531  | 15265  | 13737  | 17644  | 4011  | 8884   | 28714  | 15634  | 5213   | 18526  | 26401  | 22091  | 8565   | 11496  | 9526   | 20619  | 15811  | 3356  | 7891   | 18202  |  | 293117  |            |
| G | 16616  | 16277  | 14403  | 16560  | 6040  | 9545   | 17221  | 25191  | 6324   | 16955  | 28272  | 19665  | 6766   | 15983  | 9995   | 25670  | 15001  | 4057  | 10701  | 20430  |  | 301672  |            |
| H | 5385   | 6315   | 4300   | 5010   | 2355  | 4376   | 5576   | 7652   | 4343   | 5386   | 10022  | 5140   | 2290   | 4505   | 5218   | 7579   | 4262   | 1208  | 3468   | 6670   |  | 101060  |            |
| I | 16677  | 12531  | 10555  | 14513  | 5121  | 8725   | 14665  | 16763  | 6320   | 13393  | 24468  | 13972  | 5020   | 11111  | 13455  | 22936  | 13373  | 3476  | 7728   | 16985  |  | 251787  |            |
| L | 28962  | 23952  | 17787  | 22958  | 9122  | 17342  | 27809  | 26942  | 10706  | 23213  | 45252  | 27871  | 9485   | 19168  | 22316  | 39042  | 21992  | 5242  | 12175  | 31264  |  | 442600  |            |
| K | 18339  | 17108  | 12414  | 14483  | 4791  | 10002  | 20883  | 16433  | 5753   | 15895  | 27578  | 22577  | 6772   | 10280  | 12960  | 21279  | 15262  | 3818  | 7507   | 17393  |  | 281527  |            |
| M | 9545   | 5830   | 5252   | 6708   | 1649  | 3764   | 9203   | 7257   | 2209   | 7000   | 10060  | 8313   | 3655   | 4576   | 4431   | 8845   | 5498   | 1219  | 3291   | 8283   |  | 116588  |            |
| F | 12212  | 10160  | 8609   | 11942  | 4418  | 6764   | 11190  | 15034  | 5118   | 10278  | 20613  | 10959  | 4365   | 10434  | 9496   | 18934  | 10537  | 2579  | 6394   | 14268  |  | 204304  |            |
| P | 12223  | 10400  | 10835  | 11523  | 3303  | 7539   | 15072  | 11891  | 4353   | 10071  | 18212  | 12339  | 4195   | 8757   | 17207  | 21167  | 11581  | 2817  | 6060   | 14044  |  | 213589  |            |
| S | 22348  | 19812  | 17526  | 19951  | 7912  | 12704  | 20664  | 27577  | 8324   | 19977  | 40337  | 21691  | 8455   | 18939  | 20148  | 49274  | 20030  | 5464  | 11357  | 24937  |  | 397427  |            |
| T | 15670  | 11338  | 10025  | 10720  | 4544  | 6899   | 13817  | 16615  | 4534   | 13440  | 22595  | 13475  | 5492   | 10651  | 11169  | 20743  | 14998  | 3145  | 7648   | 17049  |  | 234567  |            |
| W | 3310   | 4069   | 3515   | 3095   | 1099  | 1826   | 3469   | 3313   | 1088   | 3644   | 5555   | 4071   | 1422   | 2631   | 2057   | 4595   | 3014   | 990   | 1734   | 3752   |  | 58249   |            |
| Y | 8754   | 7026   | 7011   | 7630   | 3083  | 4361   | 7791   | 10510  | 3154   | 7282   | 13042  | 7979   | 3417   | 6541   | 5623   | 11076  | 6827   | 1976  | 4864   | 9070   |  | 137017  |            |
| V | 21943  | 14122  | 12450  | 17379  | 5658  | 9630   | 20199  | 18881  | 6629   | 17219  | 30072  | 19062  | 7178   | 14454  | 14477  | 26581  | 16789  | 3728  | 9981   | 24509  |  | 310941  |            |
| Σ | 294724 | 241286 | 203901 | 243138 | 86902 | 155514 | 293586 | 302039 | 101338 | 252339 | 443716 | 282132 | 106494 | 204837 | 213993 | 398398 | 235049 | 58440 | 137379 | 311652 |  | 4566857 | 4566857    |

|   | A      | R      | N      | D      | C      | Q      | E      | G      | H      | I      | L      | K      | M      | F      | P      | S      | T      | W      | Y      | V      |  |
|---|--------|--------|--------|--------|--------|--------|--------|--------|--------|--------|--------|--------|--------|--------|--------|--------|--------|--------|--------|--------|--|
| A | 0.335  | -0.059 | -0.134 | -0.176 | 0.038  | -0.186 | -0.053 | -0.040 | -0.180 | 0.055  | 0.028  | -0.034 | 0.142  | -0.031 | -0.156 | -0.020 | 0.090  | -0.135 | -0.012 | 0.080  |  |
| R | -0.106 | 0.312  | 0.055  | -0.020 | 0.033  | -0.044 | 0.002  | -0.078 | -0.003 | 0.025  | -0.019 | 0.108  | -0.050 | 0.096  | -0.143 | -0.077 | -0.115 | 0.103  | -0.023 | -0.015 |  |
| N | -0.099 | -0.097 | 0.256  | -0.144 | -0.015 | 0.116  | -0.178 | 0.162  | 0.140  | 0.035  | 0.074  | -0.120 | -0.053 | -0.066 | 0.146  | -0.063 | -0.068 | 0.018  | 0.006  | -0.010 |  |
| D | -0.062 | -0.160 | -0.136 | 0.233  | -0.082 | -0.027 | 0.162  | 0.061  | 0.044  | 0.042  | 0.025  | -0.183 | 0.063  | 0.058  | 0.059  | -0.112 | -0.163 | -0.019 | 0.058  | 0.046  |  |
| C | -0.259 | 0.102  | 0.021  | -0.073 | 0.446  | -0.174 | -0.296 | 0.165  | 0.051  | -0.041 | 0.059  | 0.073  | -0.183 | 0.105  | 0.026  | 0.075  | -0.105 | -0.047 | 0.047  | -0.046 |  |
| Q | -0.023 | 0.129  | 0.081  | -0.116 | -0.121 | 0.499  | 0.048  | -0.095 | 0.061  | 0.055  | -0.035 | -0.014 | 0.092  | -0.108 | -0.022 | -0.142 | 0.010  | -0.039 | -0.118 | -0.041 |  |
| E | 0.129  | -0.014 | 0.048  | 0.123  | -0.330 | -0.116 | 0.421  | -0.215 | -0.221 | 0.134  | -0.076 | 0.199  | 0.226  | -0.134 | -0.366 | -0.215 | 0.047  | -0.111 | -0.111 | -0.094 |  |
| G | -0.158 | 0.021  | 0.067  | 0.031  | 0.051  | -0.073 | -0.119 | 0.233  | -0.057 | 0.017  | -0.036 | 0.054  | -0.039 | 0.167  | -0.347 | -0.025 | -0.034 | 0.050  | 0.165  | -0.008 |  |
| H | -0.192 | 0.168  | -0.048 | -0.071 | 0.203  | 0.240  | -0.153 | 0.135  | 0.661  | -0.036 | 0.020  | -0.194 | -0.029 | -0.006 | 0.097  | -0.151 | -0.199 | -0.068 | 0.132  | -0.033 |  |
| I | 0.026  | -0.060 | -0.063 | 0.079  | 0.067  | 0.017  | -0.099 | 0.007  | 0.123  | -0.038 | 0.000  | -0.107 | -0.157 | -0.016 | 0.131  | 0.043  | 0.031  | 0.076  | 0.020  | -0.012 |  |
| L | 0.014  | 0.024  | -0.105 | -0.026 | 0.080  | 0.140  | -0.023 | -0.083 | 0.086  | -0.052 | 0.051  | 0.019  | -0.084 | -0.035 | 0.073  | 0.011  | -0.035 | -0.077 | -0.089 | 0.034  |  |
| K | 0.009  | 0.140  | -0.012 | -0.034 | -0.112 | 0.042  | 0.143  | -0.125 | -0.082 | 0.022  | 0.008  | 0.261  | 0.031  | -0.206 | -0.018 | -0.143 | 0.052  | 0.058  | -0.121 | -0.099 |  |
| M | 0.238  | -0.055 | 0.009  | 0.078  | -0.297 | -0.053 | 0.205  | -0.061 | -0.158 | 0.083  | -0.119 | 0.143  | 0.296  | -0.133 | -0.209 | -0.140 | -0.087 | -0.202 | -0.064 | 0.040  |  |
| F | -0.077 | -0.061 | -0.058 | 0.093  | 0.128  | -0.028 | -0.160 | 0.107  | 0.121  | -0.094 | 0.038  | -0.141 | -0.087 | 0.130  | -0.008 | 0.060  | 0.002  | -0.014 | 0.040  | 0.023  |  |
| P | -0.120 | -0.082 | 0.128  | 0.013  | -0.207 | 0.036  | 0.093  | -0.172 | -0.085 | -0.159 | -0.131 | -0.067 | -0.172 | -0.090 | 0.542  | 0.128  | 0.052  | 0.030  | -0.059 | -0.037 |  |
| S | -0.138 | -0.058 | -0.012 | -0.059 | 0.045  | -0.063 | -0.212 | 0.048  | -0.058 | -0.095 | 0.044  | -0.124 | -0.092 | 0.061  | 0.079  | 0.352  | -0.021 | 0.072  | -0.051 | -0.084 |  |
| T | 0.035  | -0.089 | -0.044 | -0.153 | 0.018  | -0.147 | -0.087 | 0.069  | -0.138 | 0.036  | -0.009 | -0.073 | 0.004  | 0.012  | 0.016  | 0.014  | 0.217  | 0.047  | 0.081  | 0.063  |  |
| W | -0.127 | 0.279  | 0.301  | -0.002 | -0.009 | -0.083 | -0.076 | -0.151 | -0.172 | 0.124  | -0.019 | 0.123  | 0.046  | 0.007  | -0.283 | -0.101 | 0.005  | 0.284  | -0.010 | -0.058 |  |
| Y | -0.010 | -0.030 | 0.136  | 0.045  | 0.168  | -0.068 | -0.123 | 0.148  | 0.037  | -0.039 | -0.021 | -0.059 | 0.067  | 0.062  | -0.133 | -0.076 | -0.032 | 0.120  | 0.166  | -0.030 |  |
| V | 0.089  | -0.151 | -0.109 | 0.049  | -0.045 | -0.095 | 0.010  | -0.085 | -0.040 | 0.002  | -0.005 | -0.008 | -0.010 | 0.036  | -0.006 | -0.020 | 0.048  | -0.065 | 0.065  | 0.144  |  |

Arabidopsis thaliana

|   | A      | R      | N     | D      | C     | Q      | E      | G      | H     | I      | L      | K      | M     | F     | P      | S      | T      | W     | Y     | V      |  | Σ       | Σ of diads |
|---|--------|--------|-------|--------|-------|--------|--------|--------|-------|--------|--------|--------|-------|-------|--------|--------|--------|-------|-------|--------|--|---------|------------|
| A | 16600  | 8881   | 4633  | 6985   | 3318  | 7373   | 11333  | 11652  | 3544  | 6852   | 17496  | 8508   | 3290  | 6631  | 9248   | 12123  | 8123   | 2063  | 4022  | 11527  |  | 164202  |            |
| R | 9349   | 9812   | 4796  | 6311   | 2821  | 5728   | 8891   | 8704   | 3404  | 5835   | 12970  | 8477   | 2481  | 4605  | 6871   | 8763   | 6231   | 1624  | 3621  | 7575   |  | 128869  |            |
| N | 4753   | 4228   | 3375  | 3423   | 1954  | 3543   | 4933   | 5299   | 2054  | 4734   | 8341   | 5020   | 1909  | 3535  | 4976   | 6161   | 4230   | 1147  | 2760  | 5151   |  | 81526   |            |
| D | 7125   | 5616   | 3743  | 6159   | 2381  | 4203   | 8071   | 7638   | 2512  | 6116   | 11634  | 5995   | 2478  | 5173  | 6678   | 8366   | 5448   | 1580  | 3680  | 7243   |  | 111839  |            |
| C | 3031   | 2981   | 1746  | 2244   | 1504  | 2314   | 2776   | 3766   | 1391  | 2145   | 4990   | 2515   | 821   | 2022  | 3099   | 4051   | 2454   | 670   | 1429  | 3008   |  | 48957   |            |
| Q | 7806   | 6328   | 3845  | 5206   | 1961  | 5857   | 8445   | 6304   | 2588  | 4349   | 10382  | 6547   | 2257  | 3219  | 5621   | 5963   | 4948   | 1247  | 2709  | 6391   |  | 101973  |            |
| E | 12403  | 8748   | 6797  | 10161  | 2864  | 6775   | 17759  | 9642   | 3277  | 7312   | 14756  | 12131  | 3548  | 5002  | 7135   | 9102   | 7690   | 1622  | 3956  | 9735   |  | 160415  |            |
| G | 11322  | 8700   | 5315  | 7456   | 3071  | 6067   | 9490   | 12235  | 3772  | 6811   | 14381  | 8897   | 2937  | 6196  | 9756   | 12074  | 8147   | 1901  | 4379  | 9005   |  | 151912  |            |
| H | 2960   | 3502   | 1870  | 1887   | 1488  | 2660   | 2894   | 3581   | 1765  | 2627   | 6256   | 2618   | 1103  | 2506  | 3455   | 4348   | 2989   | 785   | 1875  | 3520   |  | 54689   |            |
| I | 6240   | 5786   | 4256  | 4844   | 2442  | 5209   | 6000   | 5635   | 2937  | 5534   | 10534  | 5983   | 2196  | 4549  | 5790   | 8020   | 5803   | 1236  | 3454  | 6139   |  | 102587  |            |
| L | 16963  | 14043  | 7884  | 10905  | 5116  | 12449  | 15922  | 14355  | 5715  | 9138   | 25714  | 13322  | 4343  | 8247  | 12772  | 16880  | 11494  | 2865  | 6240  | 13601  |  | 227968  |            |
| K | 9471   | 7584   | 5546  | 7349   | 2405  | 5765   | 11509  | 7689   | 3084  | 6711   | 12008  | 11263  | 3045  | 4380  | 6448   | 8103   | 6989   | 1368  | 4018  | 8202   |  | 132937  |            |
| M | 5253   | 2522   | 2076  | 2961   | 934   | 2035   | 4191   | 3283   | 933   | 2046   | 4640   | 3433   | 1239  | 1791  | 2463   | 3558   | 2749   | 583   | 1318  | 3340   |  | 51348   |            |
| F | 5001   | 4833   | 3279  | 4251   | 2194  | 4078   | 4847   | 5697   | 2379  | 4488   | 9990   | 4361   | 1661  | 3879  | 4648   | 7434   | 4735   | 1291  | 2989  | 5545   |  | 87580   |            |
| P | 10352  | 7241   | 4004  | 6315   | 2428  | 5807   | 10048  | 11549  | 2814  | 4209   | 11100  | 6126   | 2113  | 4284  | 11572  | 10784  | 6411   | 1712  | 3338  | 8395   |  | 130602  |            |
| S | 11228  | 9696   | 5440  | 7837   | 3817  | 7333   | 10656  | 12271  | 3971  | 6837   | 16970  | 8626   | 3012  | 6716  | 10770  | 16626  | 8703   | 2362  | 4690  | 10463  |  | 168024  |            |
| T | 8608   | 5660   | 3911  | 5650   | 2782  | 4864   | 7637   | 8101   | 2756  | 5337   | 11985  | 5974   | 2349  | 4906  | 7232   | 8997   | 6307   | 1554  | 3570  | 8708   |  | 116888  |            |
| W | 1977   | 1753   | 1309  | 1696   | 639   | 1138   | 1871   | 1786   | 745   | 1342   | 2842   | 1918   | 690   | 1084  | 1173   | 1968   | 1588   | 474   | 833   | 1828   |  | 28654   |            |
| Y | 3619   | 3982   | 2641  | 3326   | 1594  | 2862   | 4116   | 4246   | 1743  | 3338   | 6602   | 3651   | 1359  | 3119  | 3209   | 4950   | 3532   | 894   | 2371  | 3955   |  | 65109   |            |
| V | 10471  | 7239   | 5318  | 7216   | 3395  | 6179   | 9319   | 8682   | 3476  | 7043   | 15020  | 8076   | 2947  | 6024  | 7952   | 10290  | 8538   | 1764  | 4042  | 10102  |  | 143093  |            |
| Σ | 164532 | 129135 | 81784 | 112182 | 49108 | 102239 | 160708 | 152115 | 54860 | 102804 | 228611 | 133441 | 45778 | 87868 | 130868 | 168561 | 117109 | 28742 | 65294 | 143433 |  | 2259172 | 2259172    |

|   | A      | R      | N      | D      | C      | Q      | E      | G      | H      | I      | L      | K      | M      | F      | P      | S      | T      | W      | Y      | V      |  |
|---|--------|--------|--------|--------|--------|--------|--------|--------|--------|--------|--------|--------|--------|--------|--------|--------|--------|--------|--------|--------|--|
| A | 0.328  | -0.055 | -0.249 | -0.155 | -0.073 | -0.008 | -0.030 | 0.052  | -0.118 | -0.087 | 0.052  | -0.131 | -0.011 | 0.038  | -0.028 | -0.011 | -0.047 | -0.013 | -0.165 | 0.100  |  |
| R | -0.004 | 0.287  | 0.028  | -0.014 | 0.007  | -0.018 | -0.031 | 0.003  | 0.084  | -0.005 | -0.005 | 0.108  | -0.051 | -0.085 | -0.083 | -0.093 | -0.070 | -0.010 | -0.028 | -0.077 |  |
| N | -0.222 | -0.097 | 0.134  | -0.168 | 0.098  | -0.041 | -0.162 | -0.035 | 0.037  | 0.244  | 0.011  | 0.042  | 0.145  | 0.109  | 0.052  | 0.013  | 0.001  | 0.101  | 0.158  | -0.005 |  |
| D | -0.134 | -0.130 | -0.079 | 0.103  | -0.021 | -0.186 | 0.014  | 0.014  | -0.078 | 0.184  | 0.028  | -0.097 | 0.089  | 0.173  | 0.030  | 0.003  | -0.062 | 0.105  | 0.130  | 0.020  |  |
| C | -0.162 | 0.063  | -0.015 | -0.080 | 0.346  | 0.043  | -0.227 | 0.133  | 0.157  | -0.038 | 0.007  | -0.140 | -0.189 | 0.060  | 0.089  | 0.103  | -0.034 | 0.073  | 0.010  | -0.033 |  |
| Q | 0.050  | 0.082  | 0.041  | 0.028  | -0.123 | 0.238  | 0.152  | -0.085 | 0.044  | -0.065 | 0.006  | 0.083  | 0.088  | -0.209 | -0.050 | -0.244 | -0.066 | -0.040 | -0.084 | -0.013 |  |
| E | 0.060  | -0.047 | 0.157  | 0.243  | -0.197 | -0.069 | 0.442  | -0.114 | -0.173 | 0.002  | -0.095 | 0.247  | 0.088  | -0.221 | -0.264 | -0.274 | -0.078 | -0.230 | -0.159 | -0.045 |  |
| G | 0.023  | 0.002  | -0.034 | -0.012 | -0.073 | -0.125 | -0.130 | 0.179  | 0.022  | -0.015 | -0.067 | -0.008 | -0.047 | 0.048  | 0.103  | 0.063  | 0.034  | -0.017 | -0.003 | -0.069 |  |
| H | -0.297 | 0.114  | -0.057 | -0.364 | 0.225  | 0.072  | -0.296 | -0.028 | 0.284  | 0.054  | 0.123  | -0.210 | -0.005 | 0.164  | 0.087  | 0.064  | 0.053  | 0.121  | 0.171  | 0.014  |  |
| I | -0.180 | -0.013 | 0.136  | -0.050 | 0.091  | 0.115  | -0.196 | -0.204 | 0.165  | 0.170  | 0.015  | -0.013 | 0.055  | 0.131  | -0.026 | 0.047  | 0.087  | -0.054 | 0.153  | -0.059 |  |
| L | 0.021  | 0.075  | -0.046 | -0.037 | 0.032  | 0.188  | -0.018 | -0.067 | 0.032  | -0.127 | 0.109  | -0.011 | -0.062 | -0.072 | -0.033 | -0.008 | -0.028 | -0.012 | -0.054 | -0.062 |  |
| K | -0.022 | -0.002 | 0.142  | 0.107  | -0.184 | -0.043 | 0.196  | -0.152 | -0.046 | 0.104  | -0.114 | 0.361  | 0.123  | -0.166 | -0.178 | -0.202 | 0.014  | -0.212 | 0.045  | -0.029 |  |
| M | 0.340  | -0.152 | 0.110  | 0.150  | -0.178 | -0.133 | 0.137  | -0.052 | -0.290 | -0.133 | -0.113 | 0.124  | 0.175  | -0.109 | -0.189 | -0.074 | 0.032  | -0.114 | -0.119 | 0.024  |  |
| F | -0.243 | -0.035 | 0.034  | -0.023 | 0.142  | 0.028  | -0.251 | -0.034 | 0.112  | 0.119  | 0.120  | -0.171 | -0.066 | 0.130  | -0.088 | 0.129  | 0.042  | 0.147  | 0.166  | -0.003 |  |
| P | 0.085  | -0.030 | -0.166 | -0.027 | -0.156 | -0.018 | 0.078  | 0.273  | -0.120 | -0.345 | -0.174 | -0.231 | -0.225 | -0.170 | 0.425  | 0.101  | -0.054 | 0.030  | -0.123 | 0.012  |  |
| S | -0.086 | 0.010  | -0.112 | -0.063 | 0.044  | -0.036 | -0.115 | 0.081  | -0.027 | -0.112 | -0.002 | -0.140 | -0.123 | 0.027  | 0.101  | 0.282  | -0.001 | 0.100  | -0.035 | -0.019 |  |
| T | 0.011  | -0.166 | -0.079 | -0.027 | 0.091  | -0.084 | -0.085 | 0.029  | -0.029 | 0.003  | 0.013  | -0.145 | -0.008 | 0.076  | 0.066  | 0.031  | 0.040  | 0.044  | 0.055  | 0.160  |  |
| W | -0.054 | 0.068  | 0.233  | 0.176  | 0.026  | -0.131 | -0.086 | -0.077 | 0.068  | 0.029  | -0.020 | 0.125  | 0.173  | -0.028 | -0.347 | -0.083 | 0.067  | 0.263  | 0.006  | 0.005  |  |
| Y | -0.270 | 0.068  | 0.114  | 0.028  | 0.119  | -0.029 | -0.118 | -0.032 | 0.098  | 0.119  | 0.002  | -0.052 | 0.030  | 0.208  | -0.162 | 0.019  | 0.045  | 0.076  | 0.231  | -0.044 |  |
| V | 0.005  | -0.122 | 0.026  | 0.015  | 0.088  | -0.047 | -0.088 | -0.104 | 0.000  | 0.078  | 0.037  | -0.046 | 0.016  | 0.079  | -0.042 | -0.037 | 0.141  | -0.032 | -0.023 | 0.106  |  |

Bos taurus

|   | A     | R     | N     | D     | C     | Q     | E     | G     | H     | I     | L      | K     | M     | F     | P     | S      | T     | W     | Y     | V     |  | Σ       | Σ of diads |
|---|-------|-------|-------|-------|-------|-------|-------|-------|-------|-------|--------|-------|-------|-------|-------|--------|-------|-------|-------|-------|--|---------|------------|
| A | 7385  | 3890  | 2704  | 4084  | 1568  | 3706  | 5691  | 5185  | 1966  | 3416  | 8522   | 4252  | 1907  | 3142  | 3892  | 6545   | 3869  | 807   | 2010  | 6137  |  | 80678   |            |
| R | 4298  | 5382  | 2675  | 3613  | 1480  | 3312  | 4841  | 3925  | 1912  | 2958  | 6732   | 4705  | 1583  | 2507  | 3318  | 5350   | 3424  | 792   | 2039  | 4151  |  | 68997   |            |
| N | 2733  | 2611  | 2076  | 1991  | 1086  | 2111  | 2620  | 3341  | 1251  | 2628  | 4458   | 2800  | 1210  | 1790  | 2748  | 3901   | 2763  | 549   | 1392  | 2765  |  | 46824   |            |
| D | 3702  | 3225  | 2280  | 4117  | 1410  | 2302  | 4974  | 4260  | 1571  | 3461  | 6260   | 3384  | 1441  | 2745  | 3425  | 5464   | 3283  | 843   | 1939  | 4213  |  | 64299   |            |
| C | 1587  | 1643  | 967   | 1296  | 765   | 1240  | 1466  | 1786  | 744   | 1170  | 2650   | 1500  | 534   | 1089  | 1499  | 2306   | 1420  | 328   | 787   | 1906  |  | 26683   |            |
| Q | 3867  | 3720  | 2384  | 2952  | 1187  | 4175  | 4431  | 3012  | 1742  | 2511  | 5568   | 3494  | 1439  | 1833  | 2802  | 4324   | 3315  | 686   | 1620  | 3322  |  | 58384   |            |
| E | 5501  | 5314  | 3512  | 5844  | 1578  | 3930  | 9471  | 4652  | 1938  | 3617  | 7922   | 6065  | 2179  | 2685  | 3204  | 5622   | 4209  | 866   | 2079  | 5091  |  | 85279   |            |
| G | 4821  | 4089  | 2860  | 3832  | 1469  | 3273  | 4557  | 5561  | 2057  | 3343  | 6665   | 4472  | 1720  | 3136  | 3548  | 6561   | 3906  | 957   | 2327  | 4816  |  | 73970   |            |
| H | 1762  | 1989  | 1251  | 1235  | 858   | 1581  | 1610  | 1975  | 1396  | 1727  | 3380   | 1696  | 821   | 1338  | 1954  | 2944   | 1966  | 480   | 1118  | 1856  |  | 32937   |            |
| I | 3338  | 3128  | 2355  | 2703  | 1320  | 2695  | 3205  | 2977  | 1585  | 2933  | 5479   | 3156  | 1304  | 2248  | 3145  | 4906   | 3462  | 675   | 1726  | 3148  |  | 55488   |            |
| L | 7774  | 6790  | 4679  | 5852  | 2626  | 6859  | 8312  | 6515  | 3405  | 5017  | 12835  | 7475  | 2540  | 4424  | 6246  | 10085  | 6339  | 1385  | 3412  | 6707  |  | 119277  |            |
| K | 4748  | 4634  | 2815  | 4204  | 1234  | 3416  | 5913  | 3854  | 1868  | 3392  | 6415   | 5903  | 1793  | 2066  | 3610  | 4820   | 3959  | 747   | 1992  | 4236  |  | 71619   |            |
| M | 2636  | 1480  | 1320  | 1826  | 591   | 1435  | 2604  | 1861  | 709   | 1225  | 2722   | 1964  | 969   | 1083  | 1321  | 2473   | 1636  | 363   | 822   | 1918  |  | 30958   |            |
| F | 2552  | 2374  | 1850  | 2235  | 1157  | 2082  | 2492  | 2767  | 1307  | 2530  | 4925   | 2330  | 1069  | 2033  | 2348  | 4265   | 2692  | 645   | 1528  | 2787  |  | 45968   |            |
| P | 4732  | 3207  | 2361  | 3576  | 1217  | 3027  | 4558  | 4405  | 1843  | 2352  | 5822   | 3077  | 1310  | 2189  | 5454  | 6111   | 3342  | 685   | 1829  | 4495  |  | 65592   |            |
| S | 7027  | 5566  | 3452  | 5285  | 2360  | 4623  | 6203  | 6547  | 2586  | 4167  | 9741   | 5156  | 2137  | 3724  | 6676  | 12347  | 5613  | 1144  | 2681  | 6624  |  | 103659  |            |
| T | 4828  | 3038  | 2288  | 3466  | 1578  | 2954  | 4541  | 4389  | 1855  | 2881  | 6519   | 3159  | 1276  | 2597  | 4200  | 5463   | 3651  | 757   | 1691  | 4792  |  | 65923   |            |
| W | 869   | 926   | 640   | 843   | 314   | 639   | 889   | 725   | 345   | 666   | 1392   | 928   | 404   | 668   | 570   | 1167   | 835   | 211   | 429   | 864   |  | 14324   |            |
| Y | 1806  | 2103  | 1464  | 1736  | 908   | 1594  | 2047  | 2189  | 954   | 1857  | 3519   | 1863  | 869   | 1541  | 1745  | 3034   | 1997  | 415   | 1300  | 2061  |  | 35002   |            |
| V | 4844  | 4031  | 3005  | 3804  | 2041  | 3545  | 4984  | 4119  | 1994  | 3737  | 8034   | 4444  | 1810  | 3254  | 3974  | 6274   | 4393  | 1039  | 2374  | 5188  |  | 76888   |            |
| Σ | 80810 | 69140 | 46938 | 64494 | 26747 | 58499 | 85409 | 74045 | 33028 | 55588 | 119560 | 71823 | 28315 | 46092 | 65679 | 103962 | 66074 | 14374 | 35095 | 77077 |  | 1222749 | 1222749    |

|   | A      | R      | N      | D      | C      | Q      | E      | G      | H      | I      | L      | K      | M      | F      | P      | S      | T      | W      | Y      | V      |
|---|--------|--------|--------|--------|--------|--------|--------|--------|--------|--------|--------|--------|--------|--------|--------|--------|--------|--------|--------|--------|
| A | 0.326  | -0.159 | -0.136 | -0.041 | -0.118 | -0.041 | 0.010  | 0.059  | -0.103 | -0.071 | 0.077  | -0.108 | 0.021  | 0.033  | -0.107 | -0.047 | -0.119 | -0.161 | -0.142 | 0.188  |
| R | -0.059 | 0.322  | 0.010  | -0.007 | -0.020 | 0.003  | 0.004  | -0.063 | 0.026  | -0.059 | -0.002 | 0.149  | -0.009 | -0.037 | -0.111 | -0.092 | -0.085 | -0.024 | 0.029  | -0.047 |
| N | -0.124 | -0.014 | 0.144  | -0.215 | 0.059  | -0.059 | -0.222 | 0.164  | -0.011 | 0.211  | -0.027 | 0.018  | 0.110  | 0.014  | 0.089  | -0.020 | 0.088  | -0.003 | 0.035  | -0.065 |
| D | -0.138 | -0.120 | -0.079 | 0.194  | 0.002  | -0.290 | 0.102  | 0.090  | -0.100 | 0.169  | -0.004 | -0.110 | -0.033 | 0.124  | -0.008 | -0.001 | -0.057 | 0.109  | 0.049  | 0.039  |
| C | -0.105 | 0.085  | -0.058 | -0.082 | 0.271  | -0.029 | -0.240 | 0.100  | 0.032  | -0.036 | 0.016  | -0.044 | -0.146 | 0.079  | 0.045  | 0.016  | -0.015 | 0.045  | 0.027  | 0.125  |
| Q | 0.002  | 0.119  | 0.062  | -0.042 | -0.073 | 0.402  | 0.083  | -0.160 | 0.099  | -0.055 | -0.025 | 0.019  | 0.062  | -0.183 | -0.113 | -0.138 | 0.049  | 0.000  | -0.034 | -0.102 |
| E | -0.024 | 0.097  | 0.070  | 0.262  | -0.167 | -0.037 | 0.464  | -0.104 | -0.173 | -0.069 | -0.051 | 0.191  | 0.098  | -0.180 | -0.357 | -0.254 | -0.091 | -0.146 | -0.163 | -0.054 |
| G | -0.014 | -0.023 | 0.007  | -0.018 | -0.097 | -0.078 | -0.126 | 0.216  | 0.029  | -0.006 | -0.082 | 0.029  | 0.004  | 0.118  | -0.113 | 0.042  | -0.023 | 0.096  | 0.092  | 0.032  |
| H | -0.211 | 0.066  | -0.011 | -0.341 | 0.175  | 0.003  | -0.357 | -0.010 | 0.451  | 0.143  | 0.048  | -0.132 | 0.074  | 0.075  | 0.099  | 0.050  | 0.099  | 0.215  | 0.168  | -0.112 |
| I | -0.094 | -0.003 | 0.100  | -0.080 | 0.084  | 0.015  | -0.190 | -0.121 | 0.056  | 0.151  | 0.010  | -0.032 | 0.015  | 0.072  | 0.054  | 0.039  | 0.144  | 0.034  | 0.080  | -0.105 |
| L | -0.014 | 0.007  | 0.022  | -0.072 | 0.006  | 0.184  | -0.002 | -0.103 | 0.055  | -0.078 | 0.096  | 0.065  | -0.084 | -0.016 | -0.025 | -0.006 | -0.017 | -0.012 | -0.003 | -0.114 |
| K | 0.003  | 0.135  | 0.024  | 0.107  | -0.239 | -0.003 | 0.167  | -0.118 | -0.035 | 0.041  | -0.088 | 0.339  | 0.078  | -0.268 | -0.064 | -0.234 | 0.023  | -0.120 | -0.031 | -0.064 |
| M | 0.253  | -0.168 | 0.105  | 0.112  | -0.136 | -0.032 | 0.186  | -0.007 | -0.165 | -0.139 | -0.106 | 0.077  | 0.301  | -0.075 | -0.230 | -0.062 | -0.022 | -0.003 | -0.078 | -0.017 |
| F | -0.174 | -0.091 | 0.047  | -0.081 | 0.140  | -0.055 | -0.253 | -0.006 | 0.051  | 0.191  | 0.091  | -0.147 | 0.004  | 0.160  | -0.050 | 0.087  | 0.080  | 0.177  | 0.147  | -0.039 |
| P | 0.088  | -0.145 | -0.064 | 0.033  | -0.165 | -0.036 | -0.005 | 0.103  | 0.039  | -0.237 | -0.097 | -0.225 | -0.148 | -0.122 | 0.437  | 0.091  | -0.059 | -0.118 | -0.029 | 0.084  |
| S | 0.025  | -0.052 | -0.142 | -0.034 | 0.040  | -0.070 | -0.155 | 0.042  | -0.079 | -0.123 | -0.040 | -0.166 | -0.116 | -0.048 | 0.181  | 0.337  | 0.002  | -0.063 | -0.104 | 0.014  |
| T | 0.103  | -0.205 | -0.101 | -0.003 | 0.090  | -0.065 | -0.014 | 0.095  | 0.041  | -0.039 | 0.011  | -0.204 | -0.179 | 0.044  | 0.171  | -0.026 | 0.025  | -0.023 | -0.112 | 0.143  |
| W | -0.086 | 0.134  | 0.152  | 0.110  | 0.002  | -0.070 | -0.118 | -0.179 | -0.115 | 0.022  | -0.006 | 0.098  | 0.197  | 0.213  | -0.300 | -0.043 | 0.076  | 0.226  | 0.043  | -0.044 |
| Y | -0.248 | 0.061  | 0.086  | -0.062 | 0.171  | -0.049 | -0.178 | 0.032  | 0.009  | 0.154  | 0.028  | -0.099 | 0.070  | 0.155  | -0.075 | 0.019  | 0.054  | 0.009  | 0.258  | -0.068 |
| V | -0.048 | -0.076 | 0.018  | -0.064 | 0.194  | -0.037 | -0.075 | -0.123 | -0.041 | 0.067  | 0.066  | -0.016 | 0.016  | 0.116  | -0.038 | -0.041 | 0.056  | 0.139  | 0.073  | 0.068  |

|   | A     | R     | N     | D     | C     | Q     | E     | G     | H     | I     | L     | K     | M     | F     | P     | S     | T     | W     | Y     | V     |  | Σ       | Σ of diads |
|---|-------|-------|-------|-------|-------|-------|-------|-------|-------|-------|-------|-------|-------|-------|-------|-------|-------|-------|-------|-------|--|---------|------------|
| A | 8197  | 3647  | 2475  | 3510  | 1451  | 3028  | 5633  | 5119  | 1418  | 3289  | 7011  | 4373  | 1606  | 2758  | 3910  | 5461  | 3729  | 777   | 1862  | 5416  |  | 74670   |            |
| R | 3799  | 4354  | 2305  | 2826  | 1269  | 2660  | 3859  | 3656  | 1449  | 2783  | 5129  | 3876  | 1235  | 1994  | 2825  | 3881  | 2817  | 763   | 1791  | 3206  |  | 56477   |            |
| N | 2531  | 2084  | 1870  | 1831  | 1010  | 1713  | 2665  | 3024  | 935   | 2407  | 3918  | 2600  | 1014  | 1658  | 2474  | 3401  | 2164  | 547   | 1374  | 2704  |  | 41924   |            |
| D | 3335  | 2429  | 2136  | 3206  | 1246  | 1944  | 4247  | 3826  | 1116  | 3069  | 5194  | 3054  | 1238  | 2382  | 2936  | 4201  | 2660  | 660   | 1852  | 3510  |  | 54241   |            |
| C | 1308  | 1345  | 951   | 1156  | 645   | 973   | 1378  | 1573  | 578   | 1102  | 2065  | 1422  | 405   | 911   | 1327  | 1927  | 1226  | 306   | 680   | 1328  |  | 22606   |            |
| Q | 3385  | 2684  | 2011  | 2247  | 1030  | 3187  | 3659  | 2605  | 1300  | 2196  | 4542  | 3113  | 1082  | 1588  | 2652  | 2950  | 2380  | 583   | 1378  | 2778  |  | 47350   |            |
| E | 5478  | 4291  | 3389  | 4920  | 1359  | 3357  | 8834  | 4270  | 1577  | 3595  | 6761  | 5979  | 1806  | 2413  | 3106  | 4551  | 3732  | 810   | 2057  | 4681  |  | 76966   |            |
| G | 4651  | 3706  | 2690  | 3515  | 1360  | 2640  | 4601  | 5168  | 1595  | 3199  | 5700  | 4384  | 1480  | 2657  | 3966  | 5589  | 3744  | 794   | 2129  | 3898  |  | 67466   |            |
| H | 1442  | 1470  | 1015  | 970   | 672   | 1120  | 1379  | 1545  | 915   | 1277  | 2654  | 1349  | 536   | 1022  | 1585  | 2027  | 1292  | 350   | 852   | 1441  |  | 24913   |            |
| I | 3226  | 2732  | 2281  | 2579  | 1150  | 2518  | 2999  | 2673  | 1322  | 2684  | 4861  | 3136  | 1157  | 2117  | 2849  | 4069  | 3127  | 575   | 1572  | 2973  |  | 50600   |            |
| L | 6836  | 5485  | 3841  | 4857  | 2097  | 5507  | 7144  | 5412  | 2583  | 4237  | 10267 | 6274  | 2032  | 3379  | 5537  | 7524  | 5228  | 1079  | 2820  | 5432  |  | 97571   |            |
| K | 4749  | 3872  | 2800  | 3730  | 1208  | 2870  | 5913  | 3796  | 1512  | 3379  | 5840  | 5871  | 1629  | 1995  | 3294  | 4086  | 3522  | 701   | 2020  | 3942  |  | 66729   |            |
| M | 2270  | 1176  | 1067  | 1466  | 414   | 1021  | 2142  | 1477  | 487   | 1069  | 2114  | 1941  | 623   | 852   | 1136  | 1710  | 1342  | 281   | 694   | 1608  |  | 24890   |            |
| F | 2219  | 1987  | 1527  | 1991  | 918   | 1878  | 2264  | 2494  | 1033  | 2111  | 4006  | 2074  | 864   | 1629  | 1953  | 3325  | 2328  | 470   | 1379  | 2468  |  | 38918   |            |
| P | 4694  | 2889  | 2027  | 2876  | 1098  | 2472  | 4302  | 5201  | 1372  | 2123  | 4818  | 3073  | 1058  | 1864  | 5380  | 5005  | 3062  | 616   | 1628  | 3748  |  | 59306   |            |
| S | 5525  | 4128  | 2944  | 4170  | 1800  | 3461  | 5150  | 5466  | 1909  | 3617  | 7197  | 4452  | 1535  | 2985  | 5288  | 8845  | 4595  | 1009  | 2229  | 5017  |  | 81322   |            |
| T | 4364  | 2523  | 2043  | 2871  | 1334  | 2217  | 3808  | 3739  | 1215  | 2823  | 5206  | 3164  | 1154  | 2198  | 3379  | 4546  | 3390  | 763   | 1764  | 4375  |  | 56876   |            |
| W | 749   | 724   | 585   | 695   | 248   | 546   | 801   | 643   | 302   | 674   | 1264  | 911   | 368   | 510   | 468   | 908   | 767   | 188   | 364   | 712   |  | 12427   |            |
| Y | 1643  | 1853  | 1418  | 1652  | 772   | 1406  | 2014  | 2057  | 822   | 1699  | 2990  | 1820  | 711   | 1438  | 1545  | 2534  | 1795  | 397   | 1149  | 1825  |  | 31540   |            |
| V | 4370  | 3195  | 2650  | 3284  | 1587  | 2926  | 4305  | 3775  | 1535  | 3365  | 6258  | 4041  | 1368  | 2650  | 3771  | 4986  | 4065  | 782   | 2013  | 4459  |  | 65385   |            |
| Σ | 74771 | 56574 | 42025 | 54352 | 22668 | 47444 | 77097 | 67519 | 24975 | 50698 | 97795 | 66907 | 22901 | 39000 | 59381 | 81526 | 56965 | 12451 | 31607 | 65521 |  | 1052177 | 1052177    |

|   | A      | R      | N      | D      | C      | Q      | E      | G      | H      | I      | L      | K      | M      | F      | P      | S      | T      | W      | Y      | V      |  |
|---|--------|--------|--------|--------|--------|--------|--------|--------|--------|--------|--------|--------|--------|--------|--------|--------|--------|--------|--------|--------|--|
| A | 0.435  | -0.096 | -0.186 | -0.094 | -0.103 | -0.106 | 0.029  | 0.066  | -0.223 | -0.090 | 0.010  | -0.082 | -0.012 | -0.004 | -0.075 | -0.058 | -0.081 | -0.129 | -0.186 | 0.153  |  |
| R | -0.055 | 0.360  | 0.022  | -0.032 | 0.042  | 0.044  | -0.070 | 0.009  | 0.078  | 0.022  | -0.023 | 0.076  | 0.005  | -0.049 | -0.121 | -0.120 | -0.082 | 0.132  | 0.054  | -0.093 |  |
| N | -0.163 | -0.079 | 0.110  | -0.168 | 0.112  | -0.099 | -0.142 | 0.117  | -0.062 | 0.175  | 0.005  | -0.025 | 0.105  | 0.065  | 0.045  | 0.046  | -0.048 | 0.098  | 0.087  | 0.035  |  |
| D | -0.145 | -0.183 | -0.014 | 0.135  | 0.064  | -0.230 | 0.066  | 0.095  | -0.143 | 0.161  | 0.030  | -0.122 | 0.047  | 0.170  | -0.042 | 0.000  | -0.099 | 0.028  | 0.128  | 0.038  |  |
| C | -0.206 | 0.101  | 0.052  | -0.010 | 0.281  | -0.047 | -0.184 | 0.081  | 0.074  | 0.012  | -0.017 | -0.011 | -0.195 | 0.084  | 0.039  | 0.095  | 0.002  | 0.134  | 0.001  | -0.058 |  |
| Q | 0.006  | 0.053  | 0.061  | -0.085 | 0.010  | 0.401  | 0.053  | -0.154 | 0.146  | -0.038 | 0.032  | 0.033  | 0.049  | -0.100 | -0.008 | -0.218 | -0.074 | 0.040  | -0.032 | -0.060 |  |
| E | 0.002  | 0.036  | 0.098  | 0.213  | -0.199 | -0.033 | 0.449  | -0.146 | -0.147 | -0.031 | -0.056 | 0.200  | 0.075  | -0.167 | -0.335 | -0.270 | -0.110 | -0.117 | -0.117 | -0.024 |  |
| G | -0.030 | 0.021  | -0.002 | 0.009  | -0.066 | -0.142 | -0.072 | 0.177  | -0.004 | -0.016 | -0.095 | 0.022  | 0.008  | 0.061  | 0.041  | 0.067  | 0.025  | -0.005 | 0.049  | -0.075 |  |
| H | -0.205 | 0.093  | 0.020  | -0.283 | 0.225  | -0.003 | -0.280 | -0.034 | 0.437  | 0.062  | 0.136  | -0.161 | -0.012 | 0.101  | 0.120  | 0.049  | -0.043 | 0.172  | 0.130  | -0.074 |  |
| I | -0.109 | 0.004  | 0.121  | -0.013 | 0.053  | 0.099  | -0.212 | -0.195 | 0.096  | 0.096  | 0.033  | -0.026 | 0.049  | 0.121  | -0.002 | 0.037  | 0.132  | -0.041 | 0.034  | -0.058 |  |
| L | -0.014 | 0.045  | -0.014 | -0.037 | -0.002 | 0.225  | -0.001 | -0.146 | 0.109  | -0.104 | 0.124  | 0.011  | -0.044 | -0.068 | 0.006  | -0.005 | -0.010 | -0.068 | -0.039 | -0.112 |  |
| K | 0.001  | 0.076  | 0.049  | 0.079  | -0.174 | -0.047 | 0.190  | -0.120 | -0.046 | 0.050  | -0.060 | 0.325  | 0.115  | -0.215 | -0.134 | -0.235 | -0.025 | -0.119 | 0.008  | -0.053 |  |
| M | 0.250  | -0.129 | 0.071  | 0.131  | -0.259 | -0.095 | 0.161  | -0.078 | -0.193 | -0.115 | -0.090 | 0.204  | 0.140  | -0.080 | -0.212 | -0.120 | -0.004 | -0.047 | -0.075 | 0.037  |  |
| F | -0.220 | -0.052 | -0.018 | -0.010 | 0.091  | 0.068  | -0.231 | -0.001 | 0.112  | 0.118  | 0.102  | -0.177 | 0.020  | 0.122  | -0.117 | 0.098  | 0.100  | 0.020  | 0.165  | 0.018  |  |
| P | 0.108  | -0.099 | -0.156 | -0.063 | -0.152 | -0.079 | -0.010 | 0.312  | -0.026 | -0.297 | -0.135 | -0.205 | -0.199 | -0.165 | 0.475  | 0.085  | -0.047 | -0.130 | -0.090 | 0.015  |  |
| S | -0.045 | -0.058 | -0.098 | -0.007 | 0.027  | -0.058 | -0.146 | 0.046  | -0.011 | -0.080 | -0.049 | -0.150 | -0.142 | -0.010 | 0.142  | 0.339  | 0.043  | 0.047  | -0.092 | -0.009 |  |
| T | 0.077  | -0.192 | -0.106 | -0.023 | 0.085  | -0.146 | -0.090 | 0.024  | -0.105 | 0.030  | -0.015 | -0.134 | -0.070 | 0.042  | 0.051  | 0.031  | 0.096  | 0.125  | 0.032  | 0.211  |  |
| W | -0.165 | 0.080  | 0.164  | 0.079  | -0.077 | -0.026 | -0.128 | -0.215 | 0.024  | 0.118  | 0.090  | 0.142  | 0.308  | 0.102  | -0.405 | -0.059 | 0.131  | 0.246  | -0.025 | -0.083 |  |
| Y | -0.311 | 0.089  | 0.118  | 0.014  | 0.128  | -0.011 | -0.138 | 0.016  | 0.093  | 0.112  | 0.020  | -0.097 | 0.035  | 0.207  | -0.142 | 0.036  | 0.050  | 0.062  | 0.193  | -0.073 |  |
| V | -0.061 | -0.096 | 0.015  | -0.028 | 0.119  | -0.008 | -0.107 | -0.106 | -0.011 | 0.066  | 0.029  | -0.028 | -0.040 | 0.089  | 0.022  | -0.016 | 0.138  | 0.011  | 0.025  | 0.091  |  |

Gallus gallus

|   | A     | R     | N     | D     | C     | Q     | E      | G     | H     | I     | L      | K     | M     | F     | P     | S      | T     | W     | Y     | V     |  | Σ       | Σ of diads |
|---|-------|-------|-------|-------|-------|-------|--------|-------|-------|-------|--------|-------|-------|-------|-------|--------|-------|-------|-------|-------|--|---------|------------|
| A | 8435  | 4350  | 3359  | 4499  | 1760  | 4186  | 6723   | 5475  | 2178  | 4401  | 9297   | 5609  | 2291  | 3645  | 4627  | 7756   | 4896  | 904   | 2344  | 6358  |  | 93093   |            |
| R | 4396  | 5992  | 3374  | 3986  | 1535  | 3802  | 5473   | 4436  | 2185  | 3881  | 7392   | 6021  | 1791  | 2933  | 3912  | 6200   | 4152  | 815   | 2360  | 4094  |  | 78730   |            |
| N | 3409  | 3216  | 2898  | 2818  | 1383  | 2746  | 3990   | 4104  | 1647  | 3683  | 6046   | 4049  | 1576  | 2377  | 3590  | 5519   | 3396  | 715   | 2089  | 3746  |  | 62997   |            |
| D | 4154  | 3706  | 3135  | 4981  | 1718  | 2884  | 6087   | 4853  | 1812  | 4526  | 7507   | 4553  | 1850  | 3407  | 4172  | 6610   | 3860  | 1002  | 2619  | 4753  |  | 78189   |            |
| C | 1696  | 1716  | 1378  | 1602  | 959   | 1471  | 1882   | 2311  | 885   | 1557  | 3039   | 1987  | 648   | 1423  | 1804  | 2846   | 1885  | 373   | 924   | 1789  |  | 32175   |            |
| Q | 4464  | 4173  | 3255  | 3566  | 1403  | 4995  | 5580   | 3672  | 1965  | 3462  | 6705   | 4635  | 1745  | 2325  | 3435  | 5106   | 3727  | 703   | 2087  | 3831  |  | 70834   |            |
| E | 6583  | 5972  | 5051  | 7024  | 2125  | 4901  | 11890  | 5642  | 2346  | 5104  | 9291   | 8424  | 2561  | 3280  | 3864  | 7127   | 5343  | 1048  | 2756  | 5900  |  | 106232  |            |
| G | 5438  | 4599  | 3966  | 4621  | 1823  | 3743  | 5711   | 6625  | 2401  | 4524  | 7284   | 6169  | 2090  | 3789  | 3741  | 7903   | 4895  | 1023  | 2865  | 5144  |  | 88354   |            |
| H | 1910  | 2276  | 1665  | 1428  | 905   | 2114  | 2126   | 2249  | 1625  | 2087  | 4155   | 2202  | 971   | 1565  | 2462  | 3525   | 2332  | 554   | 1302  | 2151  |  | 39604   |            |
| I | 4296  | 3923  | 3114  | 3618  | 1739  | 3650  | 4444   | 3849  | 2226  | 3941  | 7070   | 4717  | 1709  | 2769  | 4076  | 6179   | 4214  | 846   | 2223  | 4121  |  | 72724   |            |
| L | 8780  | 7304  | 6078  | 7059  | 3014  | 8022  | 9635   | 7526  | 4093  | 6134  | 14321  | 9354  | 2919  | 5092  | 7374  | 11923  | 7298  | 1495  | 4007  | 7828  |  | 139256  |            |
| K | 6038  | 6000  | 4081  | 5375  | 1901  | 4633  | 8141   | 4942  | 2379  | 4719  | 8442   | 8420  | 2396  | 2759  | 5061  | 6806   | 4967  | 934   | 2765  | 5573  |  | 96332   |            |
| M | 3106  | 1698  | 1723  | 2290  | 712   | 1768  | 3131   | 2077  | 901   | 1499  | 3030   | 2629  | 968   | 1329  | 1765  | 3085   | 1912  | 373   | 1083  | 2170  |  | 37249   |            |
| F | 3094  | 2824  | 2337  | 2896  | 1374  | 2587  | 2894   | 3400  | 1558  | 2954  | 5831   | 3056  | 1189  | 2342  | 2854  | 5166   | 3272  | 640   | 1857  | 3306  |  | 55431   |            |
| P | 5356  | 3784  | 3150  | 4118  | 1584  | 3564  | 5793   | 5367  | 2116  | 3183  | 6671   | 4263  | 1658  | 2918  | 6648  | 7623   | 4345  | 722   | 2420  | 5396  |  | 80679   |            |
| S | 7845  | 6152  | 5055  | 6714  | 2839  | 5655  | 7817   | 8035  | 3365  | 5606  | 11807  | 6962  | 2602  | 4502  | 8410  | 14657  | 6879  | 1330  | 3451  | 7454  |  | 127137  |            |
| T | 5481  | 3530  | 3074  | 4192  | 1875  | 3277  | 5687   | 5488  | 2095  | 3781  | 7329   | 4302  | 1756  | 3069  | 5155  | 7110   | 4362  | 939   | 2267  | 5565  |  | 80334   |            |
| W | 978   | 963   | 802   | 968   | 369   | 689   | 1047   | 869   | 391   | 834   | 1602   | 1211  | 462   | 681   | 591   | 1230   | 888   | 271   | 502   | 867   |  | 16215   |            |
| Y | 2166  | 2403  | 1990  | 2148  | 1063  | 2089  | 2661   | 2835  | 1204  | 2501  | 4212   | 2544  | 1066  | 1930  | 2300  | 3901   | 2512  | 508   | 1596  | 2476  |  | 44105   |            |
| V | 5617  | 4341  | 3655  | 4486  | 2169  | 4200  | 5691   | 4686  | 2365  | 4487  | 8552   | 5479  | 1914  | 3433  | 4939  | 7205   | 5306  | 1064  | 2710  | 5521  |  | 87820   |            |
| Σ | 93242 | 78922 | 63140 | 78389 | 32250 | 70976 | 106403 | 88441 | 39737 | 72864 | 139583 | 96586 | 34162 | 55568 | 80780 | 127477 | 80441 | 16259 | 44227 | 88043 |  | 1487490 | 1487490    |

|   | A      | R      | N      | D      | C      | Q      | E      | G      | H      | I      | L      | K      | M      | F      | P      | S      | T      | W      | Y      | V      |  |
|---|--------|--------|--------|--------|--------|--------|--------|--------|--------|--------|--------|--------|--------|--------|--------|--------|--------|--------|--------|--------|--|
| A | 0.368  | -0.127 | -0.162 | -0.087 | -0.137 | -0.059 | 0.010  | -0.011 | -0.133 | -0.036 | 0.062  | -0.075 | 0.069  | 0.047  | -0.089 | -0.028 | -0.028 | -0.118 | -0.166 | 0.143  |  |
| R | -0.116 | 0.361  | 0.010  | -0.040 | -0.106 | 0.012  | -0.029 | -0.054 | 0.038  | 0.006  | 0.001  | 0.164  | -0.010 | -0.003 | -0.089 | -0.085 | -0.025 | -0.054 | 0.008  | -0.129 |  |
| N | -0.147 | -0.039 | 0.080  | -0.164 | 0.012  | -0.090 | -0.122 | 0.091  | -0.022 | 0.177  | 0.022  | -0.010 | 0.086  | 0.010  | 0.048  | 0.022  | -0.003 | 0.038  | 0.109  | 0.005  |  |
| D | -0.165 | -0.113 | -0.057 | 0.190  | 0.013  | -0.257 | 0.085  | 0.043  | -0.142 | 0.167  | 0.023  | -0.109 | 0.030  | 0.154  | -0.018 | -0.014 | -0.091 | 0.159  | 0.119  | 0.027  |  |
| C | -0.173 | 0.005  | 0.009  | -0.057 | 0.318  | -0.043 | -0.201 | 0.189  | 0.029  | -0.012 | 0.007  | -0.050 | -0.131 | 0.169  | 0.032  | 0.032  | 0.080  | 0.059  | -0.035 | -0.063 |  |
| Q | 0.005  | 0.105  | 0.079  | -0.046 | -0.090 | 0.391  | 0.096  | -0.137 | 0.038  | -0.002 | 0.009  | 0.008  | 0.070  | -0.129 | -0.113 | -0.173 | -0.027 | -0.097 | -0.009 | -0.090 |  |
| E | -0.011 | 0.058  | 0.113  | 0.227  | -0.081 | -0.034 | 0.448  | -0.113 | -0.190 | -0.019 | -0.070 | 0.200  | 0.049  | -0.191 | -0.401 | -0.245 | -0.073 | -0.103 | -0.136 | -0.064 |  |
| G | -0.018 | -0.019 | 0.056  | -0.008 | -0.050 | -0.119 | -0.101 | 0.232  | 0.017  | 0.044  | -0.129 | 0.073  | 0.030  | 0.138  | -0.249 | 0.043  | 0.024  | 0.058  | 0.087  | -0.017 |  |
| H | -0.262 | 0.080  | -0.010 | -0.379 | 0.053  | 0.112  | -0.287 | -0.046 | 0.429  | 0.073  | 0.112  | -0.155 | 0.065  | 0.056  | 0.135  | 0.038  | 0.085  | 0.247  | 0.100  | -0.086 |  |
| I | -0.059 | 0.017  | 0.009  | -0.058 | 0.098  | 0.051  | -0.158 | -0.116 | 0.136  | 0.101  | 0.035  | -0.001 | 0.023  | 0.019  | 0.032  | -0.009 | 0.069  | 0.062  | 0.028  | -0.044 |  |
| L | 0.006  | -0.012 | 0.028  | -0.039 | -0.002 | 0.188  | -0.033 | -0.095 | 0.096  | -0.106 | 0.092  | 0.034  | -0.091 | -0.021 | -0.025 | -0.001 | -0.031 | -0.018 | -0.033 | -0.052 |  |
| K | 0.000  | 0.160  | -0.002 | 0.057  | -0.094 | 0.008  | 0.167  | -0.148 | -0.079 | 0.000  | -0.068 | 0.297  | 0.080  | -0.266 | -0.033 | -0.193 | -0.048 | -0.120 | -0.035 | -0.023 |  |
| M | 0.285  | -0.152 | 0.086  | 0.154  | -0.126 | -0.005 | 0.161  | -0.064 | -0.099 | -0.197 | -0.143 | 0.083  | 0.124  | -0.046 | -0.136 | -0.034 | -0.052 | -0.088 | -0.022 | -0.016 |  |
| F | -0.116 | -0.041 | -0.007 | -0.009 | 0.134  | -0.022 | -0.315 | 0.031  | 0.051  | 0.084  | 0.114  | -0.164 | -0.068 | 0.123  | -0.053 | 0.084  | 0.088  | 0.055  | 0.119  | 0.008  |  |
| P | 0.057  | -0.123 | -0.084 | -0.032 | -0.099 | -0.077 | 0.004  | 0.112  | -0.018 | -0.216 | -0.127 | -0.206 | -0.111 | -0.032 | 0.417  | 0.098  | -0.004 | -0.200 | 0.009  | 0.122  |  |
| S | -0.016 | -0.092 | -0.065 | 0.002  | 0.030  | -0.070 | -0.151 | 0.061  | -0.009 | -0.105 | -0.010 | -0.170 | -0.115 | -0.054 | 0.197  | 0.297  | 0.001  | -0.044 | -0.091 | -0.009 |  |
| T | 0.085  | -0.189 | -0.104 | -0.010 | 0.074  | -0.157 | -0.010 | 0.139  | -0.024 | -0.040 | -0.028 | -0.193 | -0.049 | 0.022  | 0.167  | 0.032  | 0.004  | 0.067  | -0.052 | 0.157  |  |
| W | -0.039 | 0.113  | 0.153  | 0.125  | 0.048  | -0.116 | -0.102 | -0.104 | -0.102 | 0.049  | 0.052  | 0.140  | 0.216  | 0.117  | -0.399 | -0.122 | 0.013  | 0.425  | 0.040  | -0.102 |  |
| Y | -0.244 | 0.027  | 0.061  | -0.079 | 0.106  | -0.007 | -0.170 | 0.078  | 0.022  | 0.146  | 0.018  | -0.118 | 0.051  | 0.158  | -0.041 | 0.032  | 0.052  | 0.052  | 0.196  | -0.053 |  |
| V | 0.020  | -0.071 | -0.020 | -0.031 | 0.130  | 0.002  | -0.099 | -0.108 | 0.008  | 0.042  | 0.037  | -0.040 | -0.052 | 0.045  | 0.035  | -0.044 | 0.111  | 0.103  | 0.037  | 0.060  |  |

Xenopus laevis



|   | A      | R     | N     | D     | C     | Q     | E     | G     | H     | I     | L      | K     | M     | F     | P     | S     | T     | W     | Y     | V     |  | Σ       | Σ of diads |
|---|--------|-------|-------|-------|-------|-------|-------|-------|-------|-------|--------|-------|-------|-------|-------|-------|-------|-------|-------|-------|--|---------|------------|
| A | 11751  | 5893  | 3797  | 6448  | 1308  | 5307  | 7970  | 8597  | 2136  | 6516  | 12857  | 5232  | 2829  | 3777  | 3839  | 5581  | 5025  | 1119  | 2582  | 7906  |  | 110470  |            |
| R | 5691   | 4351  | 2275  | 3837  | 733   | 3884  | 4676  | 4401  | 2023  | 4208  | 7347   | 2754  | 1613  | 3015  | 2687  | 3289  | 2796  | 914   | 2322  | 4888  |  | 67704   |            |
| N | 3787   | 2414  | 1649  | 2167  | 449   | 1842  | 2305  | 3167  | 1040  | 2789  | 4096   | 1728  | 1047  | 1531  | 2532  | 2122  | 2050  | 534   | 1164  | 2907  |  | 41320   |            |
| D | 5778   | 3464  | 2356  | 3310  | 705   | 2222  | 4213  | 4516  | 1362  | 4680  | 6145   | 2921  | 1574  | 2454  | 2528  | 3294  | 3030  | 984   | 2250  | 4857  |  | 62643   |            |
| C | 1170   | 805   | 402   | 709   | 188   | 640   | 713   | 1447  | 460   | 729   | 1136   | 428   | 169   | 519   | 638   | 779   | 525   | 209   | 411   | 794   |  | 12871   |            |
| Q | 5843   | 3885  | 1470  | 2278  | 461   | 4816  | 2830  | 3809  | 1630  | 2715  | 6729   | 2054  | 1299  | 1984  | 2819  | 2533  | 2274  | 834   | 1374  | 4265  |  | 55902   |            |
| E | 6571   | 4880  | 2843  | 3109  | 619   | 4730  | 4338  | 4605  | 1834  | 4211  | 8138   | 3871  | 1923  | 2434  | 2365  | 3360  | 3419  | 818   | 1663  | 5030  |  | 70761   |            |
| G | 7157   | 4877  | 2857  | 4522  | 1252  | 3526  | 5544  | 6868  | 2215  | 6000  | 8673   | 5015  | 2559  | 3726  | 2660  | 4818  | 4307  | 1212  | 2714  | 6902  |  | 87404   |            |
| H | 2308   | 1540  | 1018  | 1284  | 471   | 1625  | 1268  | 2240  | 957   | 1733  | 2851   | 1016  | 556   | 1246  | 1793  | 1560  | 1346  | 475   | 894   | 1824  |  | 28005   |            |
| I | 7212   | 4038  | 2854  | 4508  | 720   | 2416  | 4521  | 5647  | 1555  | 3819  | 6115   | 3039  | 1357  | 2200  | 3184  | 4157  | 4070  | 647   | 1842  | 4513  |  | 68414   |            |
| L | 13357  | 7286  | 4798  | 7080  | 1379  | 5373  | 6752  | 9135  | 2764  | 6473  | 13111  | 5358  | 2675  | 4659  | 6524  | 7681  | 7110  | 1429  | 3067  | 8486  |  | 124497  |            |
| K | 5032   | 3331  | 1949  | 2471  | 322   | 2750  | 3068  | 3468  | 1116  | 2738  | 5663   | 2504  | 1169  | 1554  | 2596  | 2633  | 2863  | 468   | 1232  | 3739  |  | 50666   |            |
| M | 3472   | 1858  | 1196  | 1421  | 292   | 1342  | 1548  | 2266  | 688   | 1696  | 3347   | 1494  | 965   | 902   | 1446  | 2162  | 1862  | 253   | 625   | 2515  |  | 31350   |            |
| F | 3751   | 2142  | 1987  | 2829  | 739   | 1357  | 2340  | 3763  | 960   | 2818  | 3498   | 1615  | 995   | 1712  | 1665  | 3089  | 2608  | 554   | 1387  | 2783  |  | 42592   |            |
| P | 4779   | 2305  | 1644  | 2991  | 433   | 2704  | 4268  | 3657  | 1249  | 2843  | 5881   | 1877  | 1200  | 1843  | 1824  | 2613  | 2609  | 656   | 1502  | 4312  |  | 51190   |            |
| S | 5835   | 3873  | 2015  | 3459  | 651   | 3012  | 3769  | 5866  | 1741  | 3353  | 7089   | 2321  | 1356  | 2332  | 2962  | 3453  | 3206  | 961   | 1790  | 4482  |  | 63526   |            |
| T | 5482   | 3223  | 1766  | 3190  | 662   | 2492  | 3461  | 4873  | 1417  | 3395  | 7829   | 2092  | 1196  | 2170  | 3521  | 2978  | 3103  | 625   | 1408  | 4266  |  | 59149   |            |
| W | 1088   | 913   | 449   | 679   | 169   | 1318  | 663   | 723   | 484   | 648   | 2278   | 455   | 313   | 611   | 601   | 640   | 440   | 228   | 419   | 1064  |  | 14183   |            |
| Y | 2690   | 2225  | 1018  | 1743  | 497   | 1906  | 1370  | 2513  | 1034  | 1562  | 3480   | 1050  | 586   | 1267  | 1558  | 1886  | 1561  | 537   | 817   | 1939  |  | 31239   |            |
| V | 8064   | 4666  | 3087  | 4764  | 871   | 2868  | 5486  | 6115  | 1543  | 5605  | 8544   | 4267  | 2335  | 2814  | 3549  | 5110  | 4966  | 786   | 1866  | 6802  |  | 84108   |            |
| Σ | 110818 | 67969 | 41430 | 62799 | 12921 | 56130 | 71103 | 87676 | 28208 | 68531 | 124807 | 51091 | 27716 | 42750 | 51291 | 63738 | 59170 | 14243 | 31329 | 84274 |  | 1157994 | 1157994    |

|   | A      | R      | N      | D      | C      | Q      | E      | G      | H      | I      | L      | K      | M      | F      | P      | S      | T      | W      | Y      | V      |
|---|--------|--------|--------|--------|--------|--------|--------|--------|--------|--------|--------|--------|--------|--------|--------|--------|--------|--------|--------|--------|
| A | 0.106  | -0.096 | -0.040 | 0.074  | 0.059  | -0.009 | 0.161  | 0.027  | -0.231 | -0.003 | 0.077  | 0.071  | 0.068  | -0.077 | -0.243 | -0.086 | -0.116 | -0.194 | -0.146 | -0.017 |
| R | -0.130 | 0.091  | -0.063 | 0.044  | -0.030 | 0.168  | 0.118  | -0.153 | 0.204  | 0.049  | 0.007  | -0.081 | -0.005 | 0.188  | -0.110 | -0.125 | -0.213 | 0.093  | 0.237  | -0.008 |
| N | -0.043 | -0.005 | 0.109  | -0.033 | -0.026 | -0.084 | -0.096 | 0.012  | 0.033  | 0.131  | -0.084 | -0.054 | 0.057  | 0.004  | 0.325  | -0.069 | -0.029 | 0.049  | 0.040  | -0.034 |
| D | -0.037 | -0.060 | 0.050  | -0.026 | 0.009  | -0.312 | 0.091  | -0.049 | -0.114 | 0.233  | -0.094 | 0.055  | 0.049  | 0.059  | -0.093 | -0.046 | -0.055 | 0.245  | 0.283  | 0.063  |
| C | -0.051 | 0.064  | -0.136 | 0.016  | 0.269  | 0.026  | -0.103 | 0.395  | 0.383  | -0.044 | -0.200 | -0.283 | -0.600 | 0.088  | 0.113  | 0.095  | -0.225 | 0.278  | 0.166  | -0.165 |
| Q | 0.088  | 0.169  | -0.308 | -0.286 | -0.302 | 0.575  | -0.193 | -0.105 | 0.180  | -0.198 | 0.111  | -0.183 | -0.030 | -0.039 | 0.130  | -0.195 | -0.228 | 0.193  | -0.096 | 0.047  |
| E | -0.030 | 0.161  | 0.116  | -0.211 | -0.243 | 0.321  | -0.002 | -0.151 | 0.062  | 0.006  | 0.065  | 0.215  | 0.127  | -0.071 | -0.282 | -0.148 | -0.056 | -0.062 | -0.141 | -0.024 |
| G | -0.156 | -0.051 | -0.090 | -0.047 | 0.250  | -0.184 | 0.032  | 0.037  | 0.040  | 0.148  | -0.083 | 0.263  | 0.202  | 0.144  | -0.375 | 0.001  | -0.036 | 0.120  | 0.138  | 0.082  |
| H | -0.149 | -0.065 | 0.016  | -0.168 | 0.410  | 0.180  | -0.305 | 0.055  | 0.339  | 0.045  | -0.057 | -0.196 | -0.187 | 0.187  | 0.368  | 0.012  | -0.061 | 0.321  | 0.165  | -0.111 |
| I | 0.097  | 0.006  | 0.154  | 0.195  | -0.058 | -0.317 | 0.073  | 0.086  | -0.069 | -0.058 | -0.187 | 0.007  | -0.188 | -0.138 | 0.049  | 0.099  | 0.152  | -0.263 | -0.005 | -0.098 |
| L | 0.114  | -0.003 | 0.074  | 0.047  | -0.007 | -0.116 | -0.124 | -0.031 | -0.093 | -0.129 | -0.023 | -0.025 | -0.108 | 0.014  | 0.168  | 0.114  | 0.111  | -0.069 | -0.094 | -0.065 |
| K | 0.037  | 0.113  | 0.073  | -0.106 | -0.563 | 0.113  | -0.014 | -0.101 | -0.101 | -0.091 | 0.036  | 0.113  | -0.037 | -0.185 | 0.146  | -0.057 | 0.101  | -0.286 | -0.107 | 0.014  |
| M | 0.146  | 0.010  | 0.064  | -0.179 | -0.181 | -0.124 | -0.218 | -0.046 | -0.104 | -0.090 | -0.009 | 0.077  | 0.252  | -0.249 | 0.041  | 0.225  | 0.150  | -0.421 | -0.305 | 0.097  |
| F | -0.083 | -0.155 | 0.265  | 0.203  | 0.441  | -0.420 | -0.111 | 0.154  | -0.078 | 0.112  | -0.272 | -0.151 | -0.024 | 0.085  | -0.125 | 0.276  | 0.181  | 0.056  | 0.185  | -0.108 |
| P | -0.025 | -0.265 | -0.108 | 0.075  | -0.277 | 0.086  | 0.306  | -0.058 | 0.002  | -0.064 | 0.064  | -0.185 | -0.021 | -0.025 | -0.218 | -0.075 | -0.003 | 0.041  | 0.081  | 0.146  |
| S | -0.041 | 0.038  | -0.120 | 0.004  | -0.085 | -0.022 | -0.034 | 0.199  | 0.118  | -0.114 | 0.035  | -0.189 | -0.114 | -0.006 | 0.051  | -0.013 | -0.012 | 0.207  | 0.041  | -0.031 |
| T | -0.032 | -0.074 | -0.181 | -0.006 | 0.003  | -0.140 | -0.048 | 0.084  | -0.017 | -0.031 | 0.205  | -0.221 | -0.169 | -0.006 | 0.296  | -0.089 | 0.026  | -0.152 | -0.128 | -0.009 |
| W | -0.221 | 0.092  | -0.122 | -0.125 | 0.066  | 0.651  | -0.273 | -0.396 | 0.337  | -0.259 | 0.399  | -0.319 | -0.081 | 0.154  | -0.044 | -0.199 | -0.499 | 0.268  | 0.088  | 0.030  |
| Y | -0.106 | 0.193  | -0.093 | 0.028  | 0.355  | 0.230  | -0.337 | 0.061  | 0.307  | -0.169 | 0.033  | -0.272 | -0.244 | 0.094  | 0.119  | 0.092  | -0.022 | 0.335  | -0.034 | -0.159 |
| V | 0.002  | -0.056 | 0.026  | 0.043  | -0.075 | -0.352 | 0.060  | -0.041 | -0.284 | 0.119  | -0.059 | 0.140  | 0.148  | -0.098 | -0.049 | 0.099  | 0.145  | -0.275 | -0.198 | 0.105  |

Yersinia pestis

|   | A      | R      | N      | D      | C     | Q      | E      | G      | H     | I      | L      | K      | M     | F      | P      | S      | T      | W     | Y      | V      |  | Σ       | Σ of diads |
|---|--------|--------|--------|--------|-------|--------|--------|--------|-------|--------|--------|--------|-------|--------|--------|--------|--------|-------|--------|--------|--|---------|------------|
| A | 13544  | 8186   | 10622  | 8866   | 2484  | 7071   | 10132  | 9381   | 3889  | 12381  | 17747  | 13022  | 3910  | 7680   | 8048   | 17385  | 12189  | 1690  | 5812   | 10776  |  | 184815  |            |
| R | 7637   | 9637   | 9372   | 8295   | 2052  | 5904   | 9185   | 7313   | 3520  | 9785   | 14397  | 12533  | 2809  | 6590   | 5666   | 12678  | 8285   | 1597  | 5319   | 7587   |  | 150161  |            |
| N | 10758  | 7504   | 16263  | 13612  | 2526  | 6569   | 14335  | 11650  | 4153  | 13818  | 17610  | 14524  | 3752  | 8895   | 8194   | 19923  | 11983  | 2256  | 6819   | 11679  |  | 206823  |            |
| D | 10368  | 7070   | 10764  | 15299  | 2298  | 5811   | 16589  | 9702   | 3760  | 14630  | 18769  | 11804  | 3711  | 9132   | 8195   | 16730  | 10120  | 2128  | 6937   | 11546  |  | 195363  |            |
| C | 2281   | 1893   | 2085   | 2295   | 1087  | 1686   | 2206   | 2801   | 1168  | 3202   | 4673   | 2652   | 832   | 2414   | 1937   | 3988   | 2353   | 546   | 1624   | 2557   |  | 44280   |            |
| Q | 6618   | 6737   | 7972   | 7104   | 1641  | 9781   | 9236   | 5811   | 2970  | 8277   | 13628  | 9143   | 2600  | 5922   | 5574   | 9864   | 6709   | 1391  | 4996   | 6857   |  | 132831  |            |
| E | 11485  | 10011  | 14910  | 14334  | 2239  | 8605   | 19752  | 9102   | 4044  | 14368  | 20992  | 17990  | 4196  | 9108   | 6934   | 16335  | 12287  | 2105  | 7427   | 11270  |  | 217494  |            |
| G | 9289   | 7053   | 9929   | 9085   | 2532  | 5793   | 9517   | 10473  | 3820  | 11552  | 15225  | 12591  | 3459  | 7582   | 5560   | 15921  | 10225  | 2044  | 6081   | 9935   |  | 167666  |            |
| H | 3594   | 3466   | 4116   | 4267   | 1226  | 2825   | 4261   | 3873   | 2452  | 4818   | 7462   | 4484   | 1256  | 3334   | 3808   | 6664   | 3975   | 869   | 2783   | 3987   |  | 73520   |            |
| I | 12159  | 9508   | 13291  | 13379  | 3244  | 8003   | 13559  | 10556  | 4871  | 14864  | 21541  | 15474  | 4170  | 10390  | 11299  | 20103  | 12885  | 2573  | 7287   | 12357  |  | 221513  |            |
| L | 17768  | 15084  | 19598  | 17880  | 4529  | 14652  | 20192  | 15107  | 7386  | 19735  | 32091  | 25185  | 5779  | 14431  | 16085  | 28215  | 17783  | 3002  | 10488  | 17172  |  | 322162  |            |
| K | 12366  | 13537  | 15325  | 14043  | 2889  | 9265   | 17950  | 10127  | 5054  | 16302  | 23638  | 23040  | 4389  | 11059  | 9996   | 19200  | 13615  | 2622  | 9183   | 13326  |  | 246926  |            |
| M | 4608   | 2998   | 4526   | 4410   | 847   | 2565   | 4531   | 3918   | 1317  | 4497   | 6171   | 5380   | 1644  | 2915   | 2688   | 6371   | 4485   | 665   | 2021   | 4200   |  | 70757   |            |
| F | 7981   | 5766   | 8890   | 9019   | 2091  | 6705   | 9186   | 8422   | 3664  | 10501  | 14885  | 10318  | 2722  | 7747   | 6558   | 12568  | 8640   | 1751  | 5555   | 8571   |  | 151540  |            |
| P | 7619   | 6036   | 8342   | 7321   | 1396  | 6649   | 9666   | 6438   | 3467  | 9850   | 14254  | 9729   | 2799  | 6632   | 8579   | 14762  | 9431   | 1494  | 4814   | 8855   |  | 148133  |            |
| S | 16296  | 13366  | 19660  | 15715  | 3619  | 12009  | 15729  | 14884  | 6580  | 19217  | 28606  | 22115  | 5801  | 13222  | 13304  | 36850  | 21302  | 2769  | 8676   | 15821  |  | 305541  |            |
| T | 11919  | 8088   | 12327  | 10217  | 2318  | 6606   | 11196  | 10380  | 4040  | 12825  | 18655  | 14100  | 3367  | 8864   | 10291  | 19575  | 15192  | 2137  | 5929   | 12070  |  | 200096  |            |
| W | 1774   | 1705   | 2267   | 2175   | 787   | 1307   | 2169   | 1766   | 724   | 2143   | 3331   | 3006   | 643   | 1833   | 1045   | 3011   | 1673   | 520   | 1325   | 2043   |  | 35247   |            |
| Y | 5767   | 4985   | 6584   | 7128   | 1908  | 4628   | 6860   | 6334   | 2872  | 7300   | 11281  | 7560   | 2242  | 5754   | 4770   | 9123   | 6123   | 1346  | 4904   | 6411   |  | 113880  |            |
| V | 11348  | 7917   | 10483  | 11285  | 2695  | 6723   | 11703  | 9813   | 3993  | 11954  | 17979  | 13144  | 3458  | 8410   | 9770   | 16794  | 11127  | 1882  | 6167   | 11813  |  | 188458  |            |
| Σ | 185179 | 150547 | 207326 | 195729 | 44408 | 133157 | 217954 | 167851 | 73744 | 222019 | 322935 | 247794 | 63539 | 151914 | 148301 | 306060 | 200382 | 35387 | 114147 | 188833 |  | 3377206 | 3377206    |

|   | A      | R      | N      | D      | C      | Q      | E      | G      | H      | I      | L      | K      | M      | F      | P      | S      | T      | W      | Y      | V      |  |  |
|---|--------|--------|--------|--------|--------|--------|--------|--------|--------|--------|--------|--------|--------|--------|--------|--------|--------|--------|--------|--------|--|--|
| A | 0.290  | -0.006 | -0.066 | -0.189 | 0.022  | -0.030 | -0.163 | 0.021  | -0.037 | 0.019  | 0.004  | -0.041 | 0.117  | -0.079 | -0.008 | 0.037  | 0.106  | -0.136 | -0.072 | 0.042  |  |  |
| R | -0.075 | 0.364  | 0.017  | -0.048 | 0.038  | -0.003 | -0.054 | -0.020 | 0.071  | -0.009 | 0.003  | 0.129  | -0.006 | -0.025 | -0.152 | -0.071 | -0.073 | 0.015  | 0.047  | -0.101 |  |  |
| N | -0.053 | -0.206 | 0.248  | 0.127  | -0.074 | -0.216 | 0.071  | 0.125  | -0.084 | 0.016  | -0.116 | -0.044 | -0.036 | -0.045 | -0.103 | 0.061  | -0.024 | 0.040  | -0.025 | 0.010  |  |  |
| D | -0.033 | -0.208 | -0.108 | 0.301  | -0.111 | -0.282 | 0.274  | -0.001 | -0.126 | 0.130  | 0.005  | -0.194 | 0.010  | 0.038  | -0.046 | -0.057 | -0.136 | 0.039  | 0.049  | 0.055  |  |  |
| C | -0.062 | -0.042 | -0.265 | -0.112 | 0.624  | -0.035 | -0.259 | 0.241  | 0.189  | 0.095  | 0.099  | -0.203 | -0.001 | 0.192  | -0.004 | -0.006 | -0.110 | 0.163  | 0.082  | 0.032  |  |  |
| Q | -0.096 | 0.129  | -0.023 | -0.080 | -0.062 | 0.625  | 0.075  | -0.128 | 0.024  | -0.054 | 0.070  | -0.064 | 0.040  | -0.009 | -0.045 | -0.199 | -0.161 | -0.001 | 0.107  | -0.080 |  |  |
| E | -0.038 | 0.032  | 0.110  | 0.129  | -0.245 | 0.003  | 0.342  | -0.172 | -0.161 | 0.005  | 0.009  | 0.120  | 0.025  | -0.072 | -0.320 | -0.188 | -0.049 | -0.079 | 0.010  | -0.076 |  |  |
| G | 0.010  | -0.058 | -0.036 | -0.067 | 0.138  | -0.132 | -0.128 | 0.229  | 0.042  | 0.047  | -0.052 | 0.023  | 0.092  | 0.005  | -0.281 | 0.047  | 0.027  | 0.151  | 0.071  | 0.058  |  |  |
| H | -0.115 | 0.056  | -0.092 | 0.001  | 0.238  | -0.026 | -0.108 | 0.058  | 0.424  | -0.003 | 0.060  | -0.185 | -0.096 | 0.008  | 0.165  | 0.000  | -0.093 | 0.120  | 0.113  | -0.031 |  |  |
| I | 0.001  | -0.038 | -0.023 | 0.041  | 0.108  | -0.087 | -0.053 | -0.042 | 0.007  | 0.021  | 0.017  | -0.049 | 0.001  | 0.042  | 0.150  | 0.001  | -0.020 | 0.103  | -0.027 | -0.002 |  |  |
| L | 0.006  | 0.049  | -0.009 | -0.043 | 0.067  | 0.143  | -0.029 | -0.058 | 0.049  | -0.071 | 0.041  | 0.063  | -0.048 | -0.004 | 0.128  | -0.034 | -0.072 | -0.117 | -0.038 | -0.048 |  |  |
| K | -0.091 | 0.207  | 0.011  | -0.019 | -0.117 | -0.050 | 0.119  | -0.192 | -0.065 | 0.004  | 0.001  | 0.240  | -0.057 | -0.004 | -0.081 | -0.153 | -0.073 | 0.013  | 0.096  | -0.035 |  |  |
| M | 0.172  | -0.051 | 0.041  | 0.073  | -0.094 | -0.084 | -0.008 | 0.108  | -0.160 | -0.034 | -0.092 | 0.036  | 0.211  | -0.088 | -0.145 | -0.006 | 0.066  | -0.109 | -0.168 | 0.060  |  |  |
| F | -0.040 | -0.158 | -0.045 | 0.027  | 0.048  | 0.115  | -0.063 | 0.112  | 0.102  | 0.053  | 0.027  | -0.075 | -0.046 | 0.128  | -0.015 | -0.089 | -0.040 | 0.098  | 0.081  | 0.011  |  |  |
| P | -0.064 | -0.090 | -0.086 | -0.159 | -0.333 | 0.130  | 0.011  | -0.134 | 0.069  | 0.011  | 0.006  | -0.111 | 0.004  | -0.005 | 0.277  | 0.095  | 0.070  | -0.038 | -0.039 | 0.067  |  |  |
| S | -0.028 | -0.019 | 0.047  | -0.119 | -0.105 | -0.003 | -0.226 | -0.020 | -0.014 | -0.044 | -0.021 | -0.014 | 0.009  | -0.039 | -0.008 | 0.286  | 0.161  | -0.145 | -0.174 | -0.077 |  |  |
| T | 0.083  | -0.098 | 0.004  | -0.127 | -0.127 | -0.178 | -0.143 | 0.043  | -0.078 | -0.025 | -0.025 | -0.040 | -0.112 | -0.015 | 0.158  | 0.076  | 0.247  | 0.019  | -0.132 | 0.076  |  |  |
| W | -0.086 | 0.082  | 0.047  | 0.063  | 0.529  | -0.061 | -0.048 | 0.008  | -0.061 | -0.078 | -0.012 | 0.150  | -0.031 | 0.145  | -0.393 | -0.059 | -0.223 | 0.342  | 0.106  | 0.036  |  |  |
| Y | -0.080 | -0.018 | -0.060 | 0.077  | 0.242  | 0.030  | -0.069 | 0.113  | 0.144  | -0.025 | 0.035  | -0.100 | 0.045  | 0.116  | -0.047 | -0.123 | -0.099 | 0.120  | 0.242  | 0.007  |  |  |
| V | 0.094  | -0.059 | -0.099 | 0.033  | 0.084  | -0.100 | -0.039 | 0.047  | -0.030 | -0.036 | -0.002 | -0.051 | -0.025 | -0.008 | 0.166  | -0.017 | -0.005 | -0.048 | -0.032 | 0.114  |  |  |

Saccharomyces cerevisiae

|   | A      | R     | N     | D     | C     | Q     | E     | G      | H     | I     | L      | K     | M     | F     | P     | S      | T     | W     | Y     | V     |  | Σ       | Σ of diads |
|---|--------|-------|-------|-------|-------|-------|-------|--------|-------|-------|--------|-------|-------|-------|-------|--------|-------|-------|-------|-------|--|---------|------------|
| A | 21683  | 7196  | 3658  | 6381  | 2169  | 3476  | 7176  | 10156  | 2508  | 5479  | 10857  | 5388  | 3199  | 4613  | 6585  | 9712   | 6773  | 1386  | 2976  | 9895  |  | 131266  |            |
| R | 6760   | 7551  | 2800  | 4193  | 1477  | 2852  | 4994  | 5800   | 2159  | 3908  | 7257   | 4671  | 1748  | 3293  | 4032  | 5933   | 3441  | 1202  | 2416  | 5235  |  | 81722   |            |
| N | 3702   | 2467  | 2171  | 2342  | 855   | 1702  | 2483  | 4234   | 1159  | 2551  | 4265   | 2631  | 1206  | 2114  | 3033  | 3789   | 2408  | 766   | 1573  | 3422  |  | 48873   |            |
| D | 6430   | 3723  | 2353  | 5517  | 1018  | 2264  | 5519  | 6909   | 1827  | 3781  | 6466   | 3420  | 1816  | 3045  | 3885  | 4692   | 3148  | 914   | 2306  | 5276  |  | 74309   |            |
| C | 1739   | 1498  | 845   | 1196  | 644   | 778   | 1202  | 2321   | 757   | 1142  | 2126   | 1305  | 498   | 968   | 1228  | 2011   | 1120  | 300   | 747   | 1411  |  | 23836   |            |
| Q | 3798   | 3002  | 1859  | 2108  | 831   | 3517  | 3107  | 3186   | 1267  | 2475  | 4863   | 2548  | 1168  | 1800  | 2789  | 3181   | 2026  | 612   | 1395  | 3343  |  | 48875   |            |
| E | 7548   | 4795  | 3074  | 4867  | 1110  | 3190  | 7848  | 5148   | 1776  | 4201  | 8301   | 5138  | 2218  | 3104  | 3192  | 4654   | 3445  | 1049  | 2503  | 5796  |  | 82957   |            |
| G | 9196   | 6464  | 3805  | 6164  | 1855  | 3441  | 5859  | 14570  | 2516  | 5002  | 8810   | 5426  | 2445  | 4431  | 4034  | 8348   | 5225  | 1762  | 3240  | 7363  |  | 109956  |            |
| H | 2610   | 2163  | 1176  | 1575  | 554   | 1330  | 1545  | 2944   | 1593  | 1494  | 3092   | 1308  | 626   | 1416  | 2157  | 2092   | 1402  | 473   | 995   | 2085  |  | 32630   |            |
| I | 5193   | 3399  | 2735  | 3504  | 1362  | 2317  | 3459  | 4606   | 1635  | 3321  | 6473   | 3286  | 1459  | 2949  | 3587  | 5237   | 3633  | 840   | 2013  | 4864  |  | 65872   |            |
| L | 11479  | 7825  | 4119  | 6418  | 2206  | 5256  | 7108  | 8419   | 3132  | 5454  | 13662  | 6631  | 2619  | 5196  | 7733  | 9581   | 5927  | 1509  | 3408  | 8929  |  | 126611  |            |
| K | 5828   | 4402  | 2823  | 3917  | 964   | 2808  | 5189  | 4448   | 1505  | 3694  | 6213   | 5401  | 1641  | 2533  | 3426  | 4528   | 3171  | 889   | 2199  | 4848  |  | 70427   |            |
| M | 4256   | 1765  | 1282  | 2143  | 562   | 1256  | 2663  | 2441   | 822   | 1538  | 2940   | 1806  | 949   | 1375  | 1681  | 2451   | 1550  | 376   | 972   | 2428  |  | 35256   |            |
| F | 4521   | 3095  | 1921  | 3230  | 1177  | 2043  | 2863  | 4423   | 1446  | 2695  | 5675   | 2510  | 1295  | 2826  | 2932  | 4599   | 2694  | 860   | 1924  | 4293  |  | 57022   |            |
| P | 7289   | 4431  | 2617  | 3681  | 1080  | 2399  | 4544  | 5255   | 1543  | 3015  | 6146   | 3205  | 1457  | 2995  | 7674  | 6707   | 3860  | 1028  | 1970  | 4886  |  | 75782   |            |
| S | 8670   | 5934  | 3801  | 5162  | 2096  | 3266  | 5089  | 8413   | 2127  | 4973  | 9282   | 5077  | 2424  | 4586  | 6146  | 12522  | 5686  | 1455  | 2808  | 6528  |  | 106045  |            |
| T | 6623   | 3274  | 2436  | 3191  | 1151  | 1836  | 3557  | 5315   | 1271  | 3582  | 6072   | 3240  | 1553  | 2977  | 3806  | 5534   | 4441  | 772   | 1916  | 5242  |  | 67789   |            |
| W | 1379   | 1363  | 744   | 987   | 341   | 580   | 969   | 1176   | 490   | 941   | 1652   | 962   | 476   | 888   | 873   | 1353   | 955   | 332   | 593   | 1193  |  | 18247   |            |
| Y | 2899   | 2412  | 1641  | 2203  | 858   | 1419  | 2163  | 3318   | 1053  | 2079  | 3648   | 1985  | 1016  | 1876  | 1918  | 2750   | 1918  | 538   | 1496  | 2842  |  | 40032   |            |
| V | 9950   | 5145  | 3194  | 5666  | 1649  | 3277  | 5800  | 7017   | 2149  | 4705  | 9108   | 4697  | 2196  | 4206  | 5186  | 6744   | 5063  | 1226  | 2734  | 8517  |  | 98229   |            |
| Σ | 131553 | 81904 | 49054 | 74445 | 23959 | 49007 | 83137 | 110099 | 32735 | 66030 | 126908 | 70635 | 32009 | 57191 | 75897 | 106418 | 67886 | 18289 | 40184 | 98396 |  | 1395736 | 1395736    |

|   | A      | R      | N      | D      | C      | Q      | E      | G      | H      | I      | L      | K      | M      | F      | P      | S      | T      | W      | Y      | V      |  |  |
|---|--------|--------|--------|--------|--------|--------|--------|--------|--------|--------|--------|--------|--------|--------|--------|--------|--------|--------|--------|--------|--|--|
| A | 0.561  | -0.068 | -0.232 | -0.093 | -0.038 | -0.282 | -0.086 | -0.019 | -0.205 | -0.125 | -0.095 | -0.209 | 0.061  | -0.154 | -0.081 | -0.030 | 0.059  | -0.216 | -0.239 | 0.067  |  |  |
| R | -0.131 | 0.454  | -0.025 | -0.039 | 0.052  | -0.006 | 0.026  | -0.106 | 0.119  | 0.011  | -0.024 | 0.122  | -0.070 | -0.017 | -0.097 | -0.049 | -0.144 | 0.116  | 0.026  | -0.096 |  |  |
| N | -0.219 | -0.151 | 0.234  | -0.107 | 0.019  | -0.008 | -0.159 | 0.094  | 0.011  | 0.098  | -0.041 | 0.062  | 0.073  | 0.054  | 0.132  | 0.017  | 0.013  | 0.179  | 0.111  | -0.007 |  |  |
| D | -0.085 | -0.158 | -0.104 | 0.331  | -0.226 | -0.142 | 0.221  | 0.164  | 0.047  | 0.073  | -0.044 | -0.095 | 0.064  | 0.000  | -0.039 | -0.189 | -0.138 | -0.063 | 0.075  | 0.007  |  |  |
| C | -0.256 | 0.069  | 0.009  | -0.061 | 0.454  | -0.073 | -0.167 | 0.211  | 0.303  | 0.013  | -0.019 | 0.079  | -0.093 | -0.009 | -0.054 | 0.101  | -0.035 | -0.040 | 0.085  | -0.175 |  |  |
| Q | -0.193 | 0.046  | 0.079  | -0.212 | -0.010 | 0.718  | 0.065  | -0.191 | 0.100  | 0.068  | 0.090  | 0.030  | 0.041  | -0.107 | 0.048  | -0.158 | -0.160 | -0.045 | -0.009 | -0.030 |  |  |
| E | -0.035 | -0.015 | 0.053  | 0.095  | -0.249 | 0.091  | 0.463  | -0.240 | -0.091 | 0.068  | 0.096  | 0.202  | 0.153  | -0.091 | -0.346 | -0.307 | -0.158 | -0.036 | 0.047  | -0.009 |  |  |
| G | -0.120 | 0.002  | -0.016 | 0.050  | -0.017 | -0.115 | -0.111 | 0.519  | -0.025 | -0.039 | -0.126 | -0.025 | -0.031 | -0.017 | -0.394 | -0.004 | -0.023 | 0.201  | 0.023  | -0.051 |  |  |
| H | -0.164 | 0.122  | 0.025  | -0.100 | -0.011 | 0.149  | -0.230 | 0.134  | 0.733  | -0.033 | 0.041  | -0.233 | -0.178 | 0.057  | 0.195  | -0.173 | -0.124 | 0.101  | 0.057  | -0.098 |  |  |
| I | -0.179 | -0.129 | 0.167  | -0.003 | 0.186  | 0.002  | -0.126 | -0.121 | 0.057  | 0.064  | 0.078  | -0.014 | -0.035 | 0.089  | 0.001  | 0.042  | 0.126  | -0.027 | 0.060  | 0.046  |  |  |
| L | -0.039 | 0.052  | -0.077 | -0.051 | 0.015  | 0.167  | -0.059 | -0.171 | 0.053  | -0.094 | 0.171  | 0.034  | -0.103 | 0.002  | 0.116  | -0.008 | -0.038 | -0.095 | -0.067 | 0.000  |  |  |
| K | -0.130 | 0.063  | 0.131  | 0.042  | -0.226 | 0.127  | 0.213  | -0.222 | -0.093 | 0.103  | -0.030 | 0.416  | 0.016  | -0.130 | -0.111 | -0.170 | -0.077 | -0.037 | 0.081  | -0.024 |  |  |
| M | 0.247  | -0.159 | 0.034  | 0.131  | -0.074 | 0.015  | 0.238  | -0.130 | -0.006 | -0.081 | -0.087 | 0.012  | 0.160  | -0.049 | -0.131 | -0.092 | -0.101 | -0.206 | -0.043 | -0.023 |  |  |
| F | -0.173 | -0.078 | -0.042 | 0.060  | 0.184  | 0.020  | -0.171 | -0.017 | 0.078  | -0.001 | 0.090  | -0.140 | -0.010 | 0.190  | -0.056 | 0.056  | -0.029 | 0.141  | 0.159  | 0.066  |  |  |
| P | 0.020  | -0.004 | -0.018 | -0.094 | -0.186 | -0.104 | 0.007  | -0.129 | -0.141 | -0.173 | -0.114 | -0.179 | -0.176 | -0.036 | 0.622  | 0.149  | 0.046  | 0.035  | -0.102 | -0.089 |  |  |
| S | -0.142 | -0.048 | 0.020  | -0.091 | 0.141  | -0.131 | -0.216 | 0.006  | -0.156 | -0.009 | -0.038 | -0.055 | -0.003 | 0.054  | 0.064  | 0.437  | 0.097  | 0.046  | -0.084 | -0.136 |  |  |
| T | 0.036  | -0.195 | 0.022  | -0.125 | -0.011 | -0.260 | -0.127 | -0.006 | -0.224 | 0.111  | -0.015 | -0.057 | -0.001 | 0.069  | 0.032  | 0.068  | 0.298  | -0.140 | -0.018 | 0.092  |  |  |
| W | -0.221 | 0.241  | 0.149  | 0.014  | 0.085  | -0.100 | -0.115 | -0.202 | 0.135  | 0.086  | -0.004 | 0.041  | 0.129  | 0.172  | -0.128 | -0.028 | 0.073  | 0.328  | 0.121  | -0.075 |  |  |
| Y | -0.264 | 0.026  | 0.154  | 0.031  | 0.222  | 0.009  | -0.097 | 0.049  | 0.115  | 0.093  | 0.002  | -0.020 | 0.101  | 0.134  | -0.127 | -0.104 | -0.015 | 0.025  | 0.261  | 0.007  |  |  |
| V | 0.072  | -0.114 | -0.078 | 0.078  | -0.022 | -0.051 | -0.009 | -0.099 | -0.070 | 0.012  | 0.020  | -0.057 | -0.026 | 0.044  | -0.030 | -0.105 | 0.058  | -0.049 | -0.034 | 0.207  |  |  |

Oriza sativa
