# Supplementary material for: Positive Evolutionary Selection of an HD Motif on Alzheimer Precursor Protein Orthologues Suggests a Functional Role
Source: PubMed Central journal article supplement (PMC3271017; doi:10.1371/journal.pcbi.1002356), 2012-02-02
Supplement: pcbi.1002356.s004.pdf [file pcbi.1002356.s004.pdf]

| Species                        | Accession number | Region  | SVMProt   | Metallopred |
|--------------------------------|------------------|---------|-----------|-------------|
| Acyrtosiphon pisum             | XP_001947569.1   | 499-556 | I,Z,Me    | Me,TM,Co    |
| Culex quinquefasciatus         | XP_001864483.1   | 517-575 | N,Me      | Me,TM,Co    |
| Brugia malayi                  | XP_001899252     | 621-677 | M,Z       | Me,TM,Z     |
| Caenorhabditis briggsae        | XP_002644641.1   | 545-615 | Z         | Me,AM,C     |
| Loligo pealei                  | ABI84193.2       | 484-544 | M,C, Me   | Me,TM,Z     |
| Aplysia californica            | AAT07668.3       | 544-594 | Z,C,Me    | Me,AM,C     |
| Aedes aegypti                  | EAT42567.1       | 624-682 | N,Z       | Me,TM,Co    |
| Drosophila simulans 1          | EDX16764.1       | 351-411 | N,M,Z,Me  | Me,TM,Cb    |
| Drosophila yakuba 2            | EDX00795.1       | 704-764 | N,M,Z,Me  | Me,TM,Cb    |
| Anopheles gambiae              | XP_312126.4      | 745-803 | N,Z,Me    | Me,TM,Co    |
| Nematostella vectensis         | EDO45291.1       | 451-507 | C,Z,Me    | Me,TM,Z     |
| Drosophila willistoni 3        | XP_002067462.1   | 775-834 | C,Z,M,    | Me,TM,Co    |
| Drosophila persimilis 4        | XP_002027785.1   | 844-903 | Z,M,      | Me,TM,Co    |
| Drosophila pseudoobscura 5     | XP_001354498.2   | 807-866 | Z,M,      | Me,TM,Co    |
| Drosophila virilis 6           | XP_002055698.1   | 743-802 | C,Z,M,    | Me,TM,Co    |
| Drosophila grimshawi 7         | XP_001992447.1   | 780-839 | Z,M,      | Me,TM,Co    |
| Drosophila erecta 8            | XP_001982404.1   | 758-818 | N,M,Z,Me  | Me,TM,Cb    |
| Drosophila ananassae 9         | XP_001966309.1   | 767-827 | N,M,Z,Me  | Me,TM,Co    |
| Nasonia vitripennis            | XP_001601635.1   | 645-700 | Z,C,Me    | Me,TM,Z     |
| Culex quinquefasciatus         | XP_001864483.1   | 517-575 | N,Z,Me    | Me,TM,Co    |
| Pediculus humanus corporis     | XP_002426948.1   | 108-162 | Z         | Me,TM,Co    |
| Manduca sexta                  | AAV25024.2       | 601-660 | Co        | Me,TM,Z     |
| Rattus norvegicus              | NP_062161.1      | 631-700 | I,C,Me    | Me,AM,C     |
| Mus musculus                   | Q53ZT3           | 631-700 | I,C,Me    | Me,AM,C     |
| Monodelphis domestica          | XP_001373948.1   | 689-758 | C,M, Me   | Me,AM,C     |
| Equus caballus                 | XP_001499900.2   | 612-681 | I,C,Me    | Me,AM,C     |
| Sus scrofa,                    | ABB82034.1       | 612-681 | I,C,Me    | Me,AM,C     |
| Gallus gallus,                 | AAG00594.1       | 612-681 | I,C,Me    | Me,AM,C     |
| Canis lupus familiaris         | AAX81908.1       | 631-700 | I,C,Me    | Me,AM,C     |
| Macaca fascicularis            | BAD51938.1       | 612-681 | I,C,Me    | Me,AM,C     |
| Ailuropoda melanoleuca         | XP_002920108.1   | 630-699 | I,C,Me    | Me,AM,C     |
| Oryctolagus cuniculus          | XP_002716819.1   | 630-699 | I,C,Me    | Me,AM,C     |
| Pan troglodytes                | AAV74286.1       | 631-700 | I,C,Me    | Me,AM,C     |
| Callithrix jacchus             | XP_002761374.1   | 631-700 | I,C,Me    | Me,TM,Co    |
| Stenella coeruleoalba          | AAX81912.1       | 610-679 | I,Z,Me    | Me,AM,C     |
| Xenopus (Silurana) tropicalis  | AAH75266.1       | 611-680 | I,C,Me    | Me,TM,Cb    |
| Xenopus laevis,                | AAH70668.1       | 610-679 | Z,C,Me    | Me,TM,Co    |
| Pongo abelii                   | NP_001127014.1   | 556-625 | I,C,Me    | Me,AM,C     |
| Cricetulus griseus             | AAB86608.1       | NA      | NA        | NA          |
| Chelydra serpentina serpentina | AAN04908.1       | NA      | NA        | NA          |
| Apis mellifera                 | XP_624124.3      | 586-639 | N,Z,C,Me  | Me,TM,Z     |
| Ixodes scapularis              | XP_002400744.1   | 151-214 | I,Co,Me   | Me,TM,Z     |
| Schistosoma mansoni            | CAZ32701.1       | 504-569 | Z,M,Co,Me | NB          |
| Hydra magnipapillata           | XP_002154415.1   | 500-563 | M         | Me,AM,C     |
| Neohelice granulata            | AC059955.1       | 250-312 | Z         | Me,TM,Z     |
| Paracentrotus lividus          | ACN53783.1       | 612-671 | C,M       | Me,TM,Z     |
| Strongylocentrotus purpuratus, | XP_790315.2      | 597-666 | M,Z       | Me,TM,Z     |
| Saccoglossus kowalevskii,      | XP_002741027.1   | 426-495 | Z,Me      | Me,AM,C     |
| Branchiostoma floridae         | XP_002613121.1   | 522-591 | Z         | Me,TM,Z     |
| Narke japonica                 | BAA24230.1       | 560-629 | I,Z       | Me,AM,C     |
| Takifugu rubripes,             | O93279.1         | 598-667 | I,Co,C,Me | Me,AM,C     |
| Tetraodon fluviatilis          | O73683.1         | 641-710 | I         | Me,AM,C     |
| Danio rerio,                   | NP_690842.1      | 555-624 | I,M       | Me,TM,Co    |
| Homo sapiens                   | P05067.3         | 631-700 | I,C,Me    | Me,AM,C     |

|                            |    |
|----------------------------|----|
| Calcium-binding            | C  |
| Iron-binding               | I  |
| Zinc-binding               | Z  |
| Metal-binding              | Me |
| Nickel-binding             | N  |
| Magnesium-binding          | M  |
| Manganese-binding          | Ma |
| Copper-binding             | Co |
| Cobalt-binding             | Cb |
| Transition Metal Binding   | TM |
| Alkali Earth Metal Binding | AM |
| NonMetal Binding           | NB |
