# Supplementary material for: Positive Evolutionary Selection of an HD Motif on Alzheimer Precursor Protein Orthologues Suggests a Functional Role
Source: PLoS Comput Biol. 2012 Feb 2;8(2):e1002356. doi: 10.1371/journal.pcbi.1002356 (PMC3271017; doi:10.1371/journal.pcbi.1002356)
Supplement: Table S2 — The p values of the different amino acid dyads in the neutral evolution simulation. The values of Panels A, B, and C were calculated from different regions (1–70, 10–54 and 1–96, respectively) of the alignment shown in Figure 1. Table A, shows the p values of 10 000 simulated runs. Table B, contains the sum of amino acid dyads in the examined regions of the 41 CAEDs. The first amino acids of the dyads are represented on the vertical axis while the second amino acids are represented on the horizontal axis. (PDF) [file pcbi.1002356.s003.pdf]

Panel A

|   | A     | R     | N     | D     | C     | Q     | E     | G     | H     | I     | L     | K     | M     | F     | P     | S     | T     | W     | Y     | V     |
|---|-------|-------|-------|-------|-------|-------|-------|-------|-------|-------|-------|-------|-------|-------|-------|-------|-------|-------|-------|-------|
| A | 471   | 2415  | 2272  | 3172  | 10000 | 4705  | 184   | 9801  | 2209  | 9049  | 8586  | 5438  | 7827  | 10000 | 6169  | 7808  | 7874  | 10000 | 6394  | 3442  |
| R | 3112  | 2164  | 2756  | 6875  | 10000 | 8367  | 2722  | 2697  | 407   | 9158  | 10000 | 7051  | 6623  | 10000 | 2472  | 5203  | 10000 | 10000 | 10000 | 7185  |
| N | 8380  | 8692  | 10000 | 9013  | 10000 | 10000 | 2033  | 8935  | 7014  | 1130  | 9464  | 897   | 6121  | 7493  | 10000 | 6507  | 1475  | 10000 | 10000 | 8099  |
| D | 617   | 2388  | 7479  | 3282  | 10000 | 6763  | 4632  | 10000 | 7631  | 4245  | 4782  | 6468  | 7102  | 6517  | 10000 | 749   | 6940  | 10000 | 7306  | 688   |
| C | 10000 | 10000 | 10000 | 10000 | 10000 | 10000 | 10000 | 10000 | 10000 | 10000 | 10000 | 10000 | 10000 | 10000 | 10000 | 10000 | 10000 | 10000 | 10000 | 10000 |
| Q | 9119  | 1996  | 8013  | 8705  | 10000 | 2826  | 2122  | 8727  | 1174  | 10000 | 9208  | 1021  | 5545  | 7010  | 2797  | 4439  | 2129  | 10000 | 10000 | 2271  |
| E | 4178  | 5368  | 1897  | 315   | 10000 | 4704  | 599   | 3945  | 4917  | 1375  | 8945  | 8809  | 7575  | 303   | 41    | 2953  | 8467  | 10000 | 5767  | 1102  |
| G | 10000 | 3538  | 8964  | 9295  | 10000 | 10000 | 6879  | 10000 | 2259  | 10000 | 3220  | 9476  | 10000 | 4169  | 8131  | 1879  | 10000 | 10000 | 1625  | 10000 |
| H | 2573  | 1664  | 5324  | 0     | 10000 | 18    | 3911  | 3928  | 675   | 7595  | 10000 | 10000 | 10000 | 1619  | 10000 | 3445  | 10000 | 10000 | 10000 | 2878  |
| I | 9100  | 8281  | 8907  | 7455  | 10000 | 5472  | 7894  | 8538  | 7935  | 7674  | 9645  | 1133  | 10000 | 8422  | 10000 | 1003  | 10000 | 10000 | 3723  | 8460  |
| L | 9894  | 4045  | 10000 | 9226  | 10000 | 6673  | 10000 | 5516  | 8663  | 8148  | 10000 | 9811  | 10000 | 10000 | 2690  | 7894  | 2071  | 10000 | 8197  | 2130  |
| K | 10000 | 10000 | 4039  | 8590  | 10000 | 10000 | 4156  | 2158  | 6353  | 8618  | 1634  | 8437  | 65    | 10000 | 5910  | 9615  | 938   | 10000 | 10000 | 4567  |
| M | 7748  | 10000 | 6147  | 424   | 10000 | 2073  | 7551  | 7228  | 2728  | 6611  | 7579  | 10000 | 10000 | 10000 | 5355  | 7196  | 1079  | 10000 | 4093  | 10000 |
| F | 334   | 1880  | 10000 | 6412  | 10000 | 4937  | 4695  | 4643  | 6166  | 8246  | 10000 | 8594  | 1065  | 589   | 10000 | 2645  | 6076  | 10000 | 3783  | 10000 |
| P | 1146  | 7891  | 5499  | 6198  | 10000 | 1507  | 4619  | 2257  | 5838  | 5435  | 8869  | 3216  | 5362  | 10000 | 6189  | 3734  | 2067  | 10000 | 10000 | 1828  |
| S | 5860  | 6082  | 1475  | 7706  | 10000 | 8808  | 389   | 2020  | 2784  | 9543  | 4172  | 7728  | 4725  | 2340  | 3476  | 2443  | 5092  | 10000 | 2657  | 5077  |
| T | 4616  | 1633  | 1246  | 9287  | 10000 | 10000 | 1583  | 9321  | 1988  | 7972  | 9619  | 3815  | 6523  | 3728  | 6011  | 8254  | 1293  | 10000 | 10000 | 2846  |
| W | 10000 | 10000 | 10000 | 10000 | 10000 | 10000 | 10000 | 10000 | 10000 | 10000 | 10000 | 10000 | 10000 | 10000 | 10000 | 10000 | 10000 | 10000 | 10000 | 10000 |
| Y | 6416  | 2963  | 10000 | 10000 | 10000 | 10000 | 1233  | 5455  | 2324  | 7039  | 10000 | 10000 | 10000 | 10000 | 10000 | 2698  | 10000 | 10000 | 10000 | 10000 |
| V | 4249  | 4000  | 10000 | 338   | 10000 | 2023  | 320   | 2442  | 648   | 10000 | 4927  | 1923  | 7167  | 929   | 10000 | 6345  | 9482  | 10000 | 5849  | 10000 |

A,

|   | A  | R  | N  | D  | C | Q  | E  | G  | H  | I  | L  | K  | M  | F  | P  | S  | T  | W | Y  | V  |
|---|----|----|----|----|---|----|----|----|----|----|----|----|----|----|----|----|----|---|----|----|
| A | 32 | 18 | 17 | 17 | 0 | 5  | 34 | 1  | 17 | 2  | 4  | 8  | 1  | 0  | 3  | 4  | 3  | 0 | 2  | 16 |
| R | 14 | 15 | 11 | 3  | 0 | 1  | 17 | 17 | 23 | 1  | 0  | 3  | 1  | 0  | 18 | 5  | 0  | 0 | 0  | 3  |
| N | 2  | 1  | 0  | 1  | 0 | 0  | 17 | 1  | 1  | 19 | 1  | 21 | 1  | 1  | 0  | 3  | 16 | 0 | 0  | 2  |
| D | 30 | 16 | 2  | 16 | 0 | 2  | 10 | 0  | 1  | 10 | 12 | 4  | 1  | 2  | 0  | 25 | 3  | 0 | 1  | 27 |
| C | 0  | 0  | 0  | 0  | 0 | 0  | 0  | 0  | 0  | 0  | 0  | 0  | 0  | 0  | 0  | 0  | 0  | 0 | 0  | 0  |
| Q | 1  | 12 | 1  | 1  | 0 | 4  | 14 | 1  | 15 | 0  | 1  | 19 | 1  | 1  | 5  | 4  | 10 | 0 | 0  | 12 |
| E | 14 | 5  | 18 | 32 | 0 | 4  | 27 | 13 | 3  | 22 | 3  | 2  | 1  | 26 | 36 | 15 | 2  | 0 | 2  | 25 |
| G | 0  | 12 | 1  | 1  | 0 | 0  | 4  | 0  | 15 | 0  | 20 | 1  | 0  | 5  | 1  | 21 | 0  | 0 | 16 | 0  |
| H | 12 | 15 | 2  | 41 | 0 | 31 | 5  | 4  | 20 | 1  | 0  | 0  | 0  | 10 | 0  | 5  | 0  | 0 | 0  | 6  |
| I | 2  | 2  | 1  | 3  | 0 | 3  | 3  | 2  | 1  | 2  | 1  | 21 | 0  | 1  | 0  | 21 | 0  | 0 | 3  | 2  |
| L | 1  | 12 | 0  | 2  | 0 | 3  | 0  | 9  | 1  | 3  | 0  | 1  | 0  | 0  | 14 | 4  | 20 | 0 | 1  | 20 |
| K | 0  | 0  | 6  | 2  | 0 | 0  | 11 | 20 | 2  | 2  | 22 | 2  | 25 | 0  | 3  | 1  | 21 | 0 | 0  | 9  |
| M | 1  | 0  | 1  | 20 | 0 | 3  | 1  | 1  | 2  | 1  | 1  | 0  | 0  | 0  | 1  | 1  | 11 | 0 | 1  | 0  |
| F | 28 | 14 | 0  | 2  | 0 | 2  | 4  | 4  | 1  | 1  | 0  | 1  | 9  | 21 | 0  | 10 | 2  | 0 | 2  | 0  |
| P | 22 | 1  | 2  | 2  | 0 | 12 | 4  | 19 | 1  | 3  | 1  | 7  | 1  | 0  | 1  | 6  | 14 | 0 | 0  | 17 |
| S | 7  | 4  | 19 | 3  | 0 | 1  | 29 | 21 | 8  | 1  | 12 | 3  | 2  | 11 | 6  | 15 | 5  | 0 | 5  | 7  |
| T | 8  | 18 | 19 | 1  | 0 | 0  | 21 | 1  | 11 | 2  | 1  | 9  | 1  | 4  | 2  | 2  | 18 | 0 | 0  | 13 |
| W | 0  | 0  | 0  | 0  | 0 | 0  | 0  | 0  | 0  | 0  | 0  | 0  | 0  | 0  | 0  | 0  | 0  | 0 | 0  | 0  |
| Y | 2  | 4  | 0  | 0  | 0 | 0  | 17 | 2  | 3  | 1  | 0  | 0  | 0  | 0  | 0  | 5  | 0  | 0 | 0  | 0  |
| V | 13 | 10 | 0  | 31 | 0 | 15 | 31 | 18 | 21 | 0  | 10 | 20 | 1  | 20 | 0  | 5  | 1  | 0 | 2  | 0  |

B,

Panel B

|   | A     | R     | N     | D     | C     | Q     | E     | G     | H     | I     | L     | K     | M     | F     | P     | S     | T     | W     | Y     | V     |
|---|-------|-------|-------|-------|-------|-------|-------|-------|-------|-------|-------|-------|-------|-------|-------|-------|-------|-------|-------|-------|
| A | 136   | 1582  | 10000 | 2352  | 10000 | 6062  | 164   | 9678  | 560   | 7832  | 10000 | 9411  | 6345  | 10000 | 7947  | 7236  | 10000 | 10000 | 4874  | 1668  |
| R | 2188  | 10000 | 10000 | 10000 | 10000 | 10000 | 2357  | 2148  | 296   | 10000 | 10000 | 6566  | 5361  | 10000 | 1627  | 10000 | 10000 | 10000 | 10000 | 5568  |
| N | 8718  | 10000 | 10000 | 10000 | 10000 | 10000 | 10000 | 10000 | 4872  | 577   | 10000 | 5682  | 4833  | 10000 | 10000 | 7978  | 10000 | 10000 | 10000 | 6696  |
| D | 318   | 1730  | 10000 | 1958  | 10000 | 5046  | 2915  | 10000 | 5773  | 3293  | 3420  | 4942  | 10000 | 7258  | 10000 | 602   | 6890  | 10000 | 6122  | 2879  |
| C | 10000 | 10000 | 10000 | 10000 | 10000 | 10000 | 10000 | 10000 | 10000 | 10000 | 10000 | 10000 | 10000 | 10000 | 10000 | 10000 | 10000 | 10000 | 10000 | 10000 |
| Q | 10000 | 1014  | 5964  | 10000 | 10000 | 1837  | 1160  | 10000 | 332   | 10000 | 10000 | 10000 | 10000 | 5560  | 2591  | 7194  | 6796  | 10000 | 10000 | 1412  |
| E | 3107  | 4408  | 10000 | 1777  | 10000 | 3452  | 224   | 6587  | 3917  | 1046  | 7818  | 8783  | 10000 | 894   | 381   | 2371  | 6931  | 10000 | 4273  | 588   |
| G | 10000 | 8809  | 8177  | 8839  | 10000 | 10000 | 5456  | 10000 | 908   | 10000 | 2825  | 10000 | 10000 | 4464  | 10000 | 1312  | 10000 | 10000 | 1351  | 10000 |
| H | 4109  | 771   | 5043  | 0     | 10000 | 484   | 2942  | 2356  | 825   | 5587  | 10000 | 10000 | 10000 | 799   | 10000 | 1905  | 10000 | 10000 | 10000 | 2053  |
| I | 8015  | 8885  | 10000 | 7970  | 10000 | 7368  | 6241  | 7611  | 7014  | 6002  | 9008  | 577   | 10000 | 10000 | 10000 | 457   | 10000 | 10000 | 10000 | 8570  |
| L | 9657  | 8308  | 10000 | 9633  | 10000 | 10000 | 10000 | 4507  | 7581  | 9026  | 10000 | 10000 | 10000 | 10000 | 6215  | 6668  | 1100  | 10000 | 10000 | 9308  |
| K | 10000 | 10000 | 4417  | 6995  | 10000 | 10000 | 7324  | 9369  | 4360  | 8923  | 8439  | 6728  | 23    | 10000 | 5064  | 8955  | 357   | 10000 | 10000 | 9105  |
| M | 6381  | 10000 | 10000 | 159   | 10000 | 1327  | 10000 | 10000 | 1782  | 5122  | 10000 | 10000 | 10000 | 10000 | 4062  | 10000 | 822   | 10000 | 10000 | 10000 |
| F | 10000 | 1491  | 10000 | 5335  | 10000 | 10000 | 3410  | 3949  | 10000 | 6424  | 10000 | 10000 | 589   | 4458  | 10000 | 1616  | 6931  | 10000 | 2139  | 10000 |
| P | 623   | 10000 | 6166  | 6912  | 10000 | 1136  | 5043  | 1921  | 4208  | 3487  | 7904  | 2247  | 3952  | 10000 | 4936  | 2662  | 4717  | 10000 | 10000 | 7626  |
| S | 7278  | 10000 | 10000 | 7617  | 10000 | 7426  | 94    | 1677  | 1813  | 10000 | 3272  | 7452  | 5768  | 1443  | 10000 | 1836  | 8654  | 10000 | 1859  | 3767  |
| T | 5322  | 1078  | 530   | 8788  | 10000 | 10000 | 742   | 9166  | 1082  | 8329  | 9107  | 10000 | 10000 | 3078  | 4736  | 8801  | 620   | 10000 | 10000 | 8646  |
| W | 10000 | 10000 | 10000 | 10000 | 10000 | 10000 | 10000 | 10000 | 10000 | 10000 | 10000 | 10000 | 10000 | 10000 | 10000 | 10000 | 10000 | 10000 | 10000 | 10000 |
| Y | 6816  | 2229  | 10000 | 10000 | 10000 | 10000 | 581   | 10000 | 10000 | 5458  | 10000 | 10000 | 10000 | 10000 | 10000 | 1846  | 10000 | 10000 | 10000 | 10000 |
| V | 2607  | 4628  | 10000 | 119   | 10000 | 892   | 2473  | 10000 | 283   | 10000 | 8131  | 893   | 5679  | 10000 | 10000 | 5683  | 9015  | 10000 | 10000 | 10000 |

A,

|   | A  | R  | N  | D  | C | Q  | E  | G  | H  | I  | L  | K  | M  | F  | P  | S  | T  | W | Y  | V  |
|---|----|----|----|----|---|----|----|----|----|----|----|----|----|----|----|----|----|---|----|----|
| A | 31 | 17 | 0  | 16 | 0 | 2  | 30 | 1  | 17 | 2  | 0  | 1  | 1  | 0  | 1  | 3  | 0  | 0 | 2  | 16 |
| R | 14 | 0  | 0  | 0  | 0 | 0  | 11 | 17 | 20 | 0  | 0  | 2  | 1  | 0  | 18 | 0  | 0  | 0 | 0  | 3  |
| N | 1  | 0  | 0  | 0  | 0 | 0  | 0  | 0  | 1  | 19 | 0  | 2  | 1  | 0  | 0  | 1  | 0  | 0 | 0  | 2  |
| D | 29 | 16 | 0  | 13 | 0 | 2  | 10 | 0  | 1  | 8  | 12 | 4  | 0  | 1  | 0  | 21 | 2  | 0 | 1  | 12 |
| C | 0  | 0  | 0  | 0  | 0 | 0  | 0  | 0  | 0  | 0  | 0  | 0  | 0  | 0  | 0  | 0  | 0  | 0 | 0  | 0  |
| Q | 0  | 12 | 1  | 0  | 0 | 3  | 12 | 0  | 14 | 0  | 0  | 0  | 0  | 1  | 3  | 1  | 1  | 0 | 0  | 11 |
| E | 12 | 4  | 0  | 14 | 0 | 3  | 25 | 3  | 2  | 19 | 3  | 1  | 0  | 17 | 20 | 11 | 2  | 0 | 2  | 22 |
| G | 0  | 1  | 1  | 1  | 0 | 0  | 4  | 0  | 15 | 0  | 20 | 0  | 0  | 4  | 0  | 19 | 0  | 0 | 16 | 0  |
| H | 2  | 12 | 1  | 41 | 0 | 12 | 3  | 4  | 4  | 1  | 0  | 0  | 0  | 9  | 0  | 4  | 0  | 0 | 0  | 4  |
| I | 2  | 1  | 0  | 2  | 0 | 1  | 3  | 2  | 1  | 2  | 1  | 21 | 0  | 0  | 0  | 21 | 0  | 0 | 0  | 1  |
| L | 1  | 2  | 0  | 1  | 0 | 0  | 0  | 9  | 1  | 1  | 0  | 0  | 0  | 0  | 2  | 4  | 20 | 0 | 0  | 1  |
| K | 0  | 0  | 3  | 2  | 0 | 0  | 2  | 1  | 2  | 1  | 2  | 2  | 23 | 0  | 3  | 1  | 21 | 0 | 0  | 1  |
| M | 1  | 0  | 0  | 20 | 0 | 3  | 0  | 0  | 2  | 1  | 0  | 0  | 0  | 0  | 1  | 0  | 10 | 0 | 0  | 0  |
| F | 0  | 14 | 0  | 2  | 0 | 0  | 4  | 3  | 0  | 1  | 0  | 0  | 9  | 1  | 0  | 10 | 1  | 0 | 2  | 0  |
| P | 21 | 0  | 1  | 1  | 0 | 9  | 2  | 19 | 1  | 3  | 1  | 6  | 1  | 0  | 1  | 6  | 2  | 0 | 0  | 1  |
| S | 3  | 0  | 0  | 2  | 0 | 1  | 29 | 19 | 5  | 0  | 11 | 2  | 1  | 11 | 0  | 13 | 1  | 0 | 5  | 6  |
| T | 4  | 17 | 19 | 1  | 0 | 0  | 19 | 1  | 11 | 1  | 1  | 0  | 0  | 3  | 2  | 1  | 18 | 0 | 0  | 1  |
| W | 0  | 0  | 0  | 0  | 0 | 0  | 0  | 0  | 0  | 0  | 0  | 0  | 0  | 0  | 0  | 0  | 0  | 0 | 0  | 0  |
| Y | 1  | 4  | 0  | 0  | 0 | 0  | 17 | 0  | 0  | 1  | 0  | 0  | 0  | 0  | 0  | 5  | 0  | 0 | 0  | 0  |
| V | 13 | 5  | 0  | 31 | 0 | 14 | 13 | 0  | 20 | 0  | 2  | 20 | 1  | 0  | 0  | 4  | 1  | 0 | 0  | 0  |

B,

Panel C

|   | A     | R     | N     | D     | C     | Q     | E     | G     | H     | I     | L     | K     | M     | F     | P     | S     | T     | W     | Y     | V     |
|---|-------|-------|-------|-------|-------|-------|-------|-------|-------|-------|-------|-------|-------|-------|-------|-------|-------|-------|-------|-------|
| A | 569   | 2514  | 2805  | 3768  | 10000 | 5820  | 371   | 5431  | 2065  | 2824  | 6270  | 5132  | 4960  | 5149  | 7138  | 8924  | 1554  | 10000 | 7734  | 4721  |
| R | 4018  | 2408  | 3050  | 7302  | 10000 | 8623  | 2605  | 3110  | 416   | 9611  | 10000 | 7616  | 7472  | 10000 | 1999  | 5921  | 10000 | 10000 | 10000 | 8435  |
| N | 7447  | 8998  | 10000 | 9176  | 10000 | 10000 | 2099  | 9378  | 7345  | 1837  | 9344  | 1148  | 7123  | 8391  | 10000 | 7152  | 1879  | 10000 | 10000 | 3173  |
| D | 875   | 2570  | 7899  | 3205  | 10000 | 7151  | 4757  | 10000 | 7724  | 5141  | 5818  | 7030  | 7775  | 7390  | 10000 | 867   | 7568  | 10000 | 7742  | 1017  |
| C | 10000 | 10000 | 10000 | 10000 | 10000 | 10000 | 10000 | 6643  | 10000 | 4885  | 10000 | 10000 | 10000 | 10000 | 10000 | 10000 | 10000 | 10000 | 10000 | 7428  |
| Q | 9522  | 2257  | 8312  | 8896  | 10000 | 3169  | 2133  | 9217  | 943   | 10000 | 9662  | 1091  | 6445  | 7903  | 2666  | 5229  | 2576  | 10000 | 10000 | 3137  |
| E | 4860  | 5839  | 1930  | 445   | 10000 | 5147  | 733   | 4757  | 5076  | 1945  | 9485  | 9105  | 8107  | 452   | 67    | 3327  | 8908  | 10000 | 6281  | 1459  |
| G | 3868  | 4368  | 9414  | 9611  | 10000 | 10000 | 7780  | 3262  | 2359  | 4588  | 4473  | 9784  | 10000 | 5469  | 8670  | 2614  | 10000 | 10000 | 2040  | 425   |
| H | 2870  | 1582  | 5529  | 0     | 10000 | 38    | 3971  | 4598  | 472   | 8403  | 9040  | 10000 | 10000 | 1810  | 10000 | 3747  | 10000 | 10000 | 10000 | 3695  |
| I | 43    | 8290  | 9516  | 8429  | 3751  | 6955  | 8809  | 2395  | 8654  | 1794  | 9995  | 2083  | 8783  | 8791  | 10000 | 2100  | 2372  | 10000 | 4865  | 2358  |
| L | 9000  | 5523  | 10000 | 9667  | 10000 | 8035  | 10000 | 7283  | 9150  | 9244  | 9992  | 3550  | 23    | 10000 | 3515  | 5245  | 3008  | 10000 | 9319  | 4456  |
| K | 10000 | 10000 | 4667  | 8812  | 10000 | 10000 | 4493  | 2748  | 6658  | 9422  | 2699  | 8805  | 122   | 10000 | 6392  | 9747  | 1050  | 10000 | 10000 | 5951  |
| M | 1617  | 7599  | 6996  | 522   | 10000 | 2756  | 8244  | 6775  | 3311  | 7053  | 1142  | 10000 | 10000 | 3432  | 6195  | 8353  | 1567  | 10000 | 5548  | 731   |
| F | 2     | 2172  | 10000 | 7350  | 10000 | 5964  | 5627  | 6339  | 6774  | 5928  | 10000 | 6809  | 1445  | 899   | 10000 | 3616  | 1794  | 10000 | 5194  | 3477  |
| P | 1380  | 8083  | 6054  | 6684  | 10000 | 1663  | 4920  | 2358  | 6037  | 6623  | 9439  | 3621  | 6154  | 10000 | 6420  | 4151  | 2174  | 10000 | 4010  | 2348  |
| S | 7135  | 6873  | 1707  | 8128  | 6433  | 9126  | 526   | 2649  | 2955  | 9109  | 5947  | 8491  | 6300  | 3331  | 4049  | 3014  | 5222  | 10000 | 3459  | 6248  |
| T | 5472  | 1888  | 748   | 9536  | 10000 | 10000 | 1639  | 9748  | 2153  | 7917  | 572   | 4582  | 5754  | 5388  | 6717  | 8126  | 1758  | 10000 | 10000 | 230   |
| W | 10000 | 10000 | 10000 | 10000 | 10000 | 10000 | 10000 | 10000 | 10000 | 10000 | 10000 | 10000 | 10000 | 10000 | 10000 | 10000 | 10000 | 10000 | 10000 | 10000 |
| Y | 7720  | 3610  | 10000 | 10000 | 10000 | 10000 | 1237  | 6872  | 2510  | 8666  | 10000 | 10000 | 10000 | 1258  | 10000 | 3615  | 10000 | 10000 | 10000 | 7464  |
| V | 4739  | 5171  | 10000 | 554   | 10000 | 2459  | 545   | 625   | 921   | 2465  | 7017  | 2479  | 821   | 10    | 10000 | 8180  | 9876  | 10000 | 2210  | 3497  |

A,

|   | A  | R  | N  | D  | C | Q  | E  | G  | H  | I  | L  | K  | M  | F  | P  | S  | T  | W | Y  | V  |
|---|----|----|----|----|---|----|----|----|----|----|----|----|----|----|----|----|----|---|----|----|
| A | 35 | 20 | 17 | 17 | 0 | 5  | 34 | 16 | 17 | 23 | 17 | 13 | 4  | 8  | 3  | 4  | 24 | 0 | 2  | 19 |
| R | 14 | 15 | 11 | 3  | 0 | 1  | 17 | 17 | 23 | 1  | 0  | 3  | 1  | 0  | 18 | 5  | 0  | 0 | 0  | 3  |
| N | 4  | 1  | 0  | 1  | 0 | 0  | 17 | 1  | 1  | 19 | 2  | 21 | 1  | 1  | 0  | 3  | 16 | 0 | 0  | 15 |
| D | 30 | 16 | 2  | 16 | 0 | 2  | 10 | 0  | 1  | 10 | 12 | 4  | 1  | 2  | 0  | 25 | 3  | 0 | 1  | 27 |
| C | 0  | 0  | 0  | 0  | 0 | 0  | 0  | 1  | 0  | 2  | 0  | 0  | 0  | 0  | 0  | 0  | 0  | 0 | 0  | 1  |
| Q | 1  | 12 | 1  | 1  | 0 | 4  | 14 | 1  | 15 | 0  | 1  | 19 | 1  | 1  | 7  | 4  | 10 | 0 | 0  | 12 |
| E | 14 | 5  | 18 | 32 | 0 | 4  | 27 | 13 | 3  | 22 | 3  | 2  | 1  | 26 | 36 | 15 | 2  | 0 | 2  | 25 |
| G | 21 | 12 | 1  | 1  | 0 | 0  | 4  | 21 | 15 | 17 | 23 | 1  | 0  | 6  | 1  | 21 | 0  | 0 | 16 | 36 |
| H | 12 | 15 | 2  | 41 | 0 | 31 | 5  | 4  | 20 | 1  | 1  | 0  | 0  | 10 | 0  | 5  | 0  | 0 | 0  | 6  |
| I | 38 | 3  | 1  | 3  | 3 | 3  | 3  | 24 | 1  | 24 | 1  | 21 | 1  | 2  | 0  | 21 | 19 | 0 | 4  | 24 |
| L | 7  | 12 | 0  | 2  | 0 | 3  | 0  | 11 | 1  | 5  | 1  | 20 | 34 | 0  | 14 | 15 | 21 | 0 | 1  | 22 |
| K | 0  | 0  | 6  | 2  | 0 | 0  | 11 | 20 | 2  | 2  | 22 | 2  | 25 | 0  | 3  | 1  | 22 | 0 | 0  | 9  |
| M | 15 | 1  | 1  | 20 | 0 | 3  | 1  | 2  | 2  | 2  | 20 | 0  | 0  | 3  | 1  | 1  | 11 | 0 | 1  | 20 |
| F | 40 | 15 | 0  | 2  | 0 | 2  | 4  | 4  | 1  | 5  | 0  | 3  | 10 | 21 | 0  | 10 | 17 | 0 | 2  | 14 |
| P | 22 | 1  | 2  | 2  | 0 | 12 | 4  | 19 | 1  | 3  | 1  | 7  | 1  | 0  | 1  | 6  | 14 | 0 | 2  | 17 |
| S | 7  | 4  | 19 | 3  | 1 | 1  | 29 | 21 | 8  | 3  | 13 | 3  | 2  | 11 | 6  | 15 | 7  | 0 | 5  | 9  |
| T | 10 | 18 | 22 | 1  | 0 | 0  | 21 | 1  | 11 | 4  | 32 | 9  | 2  | 4  | 2  | 3  | 18 | 0 | 0  | 33 |
| W | 0  | 0  | 0  | 0  | 0 | 0  | 0  | 0  | 0  | 0  | 0  | 0  | 0  | 0  | 0  | 0  | 0  | 0 | 0  | 0  |
| Y | 2  | 4  | 0  | 0  | 0 | 0  | 17 | 2  | 3  | 1  | 0  | 0  | 0  | 15 | 0  | 5  | 0  | 0 | 0  | 2  |
| V | 19 | 10 | 0  | 31 | 0 | 15 | 31 | 35 | 21 | 24 | 14 | 21 | 20 | 38 | 0  | 5  | 1  | 0 | 14 | 21 |

B,
